# Supplementary material
Source: publisher figshare collection journal article supplement (https://diabetesjournals.figshare.com/ndownloader/files/28300830)
Supplement: Supplementary file 1 [file 28300830]

## Sheet: Table S1
Table S1. The association between standardized T2D GRSs and traits related to glucose-insulin homeostasis among youth in the EPOCH study when controlling for pubertal development (Tanner stage). This table shows the regression results from linear regression models in the cohort of weighted and unweighted T2D GRSs as predictors of five log-transformed traits: fasting glucose, 2-hour glucose, HOMA-…
GRS	Outcome	Estimate	Lower Confidence Limit	Upper Confidence Limit	P value
Weighted	Fasting glucose	0.00705651	-0.00634648	0.0204595	0.301144
Weighted	2-hr glucose	0.0269112	-0.000786579	0.0546091	0.0568292
Weighted	HOMA-IR	0.0178502	-0.0366903	0.0723907	0.520178
Weighted	Oral Disposition Index	-0.106917	-0.19171	-0.0221248	0.0136293
Weighted	Insulinogenic Index	-0.0844222	-0.168747	-9.759e-05	0.0497371
Unweighted	Fasting glucose	0.014294	0.00115373	0.0274342	0.0330921
Unweighted	2-hr glucose	0.0288062	0.00150819	0.0561041	0.0386823
Unweighted	HOMA-IR	0.031411	-0.0222758	0.0850977	0.250619
Unweighted	Oral Disposition Index	-0.0651309	-0.149377	0.0191152	0.129231
Unweighted	Insulinogenic Index	-0.0468093	-0.130436	0.0368175	0.27159

## Sheet: Table S2 
Table S2. Single variant analyses in EPOCH of the T2D-associated SNPs. This table shows the results of additive linear regression models of the T2D-associated SNPs (established in adults) as predictors of traits related to glucose – insulin homeostasis in the EPOCH cohort. Models controlled for age, sex, BMI z-score, in utero exposure to maternal diabetes, and the first 5 genetic prinicpal compon…
						T2D		Fasting glucose				2-hour glucose				HOMA-IR				Insulinogenic Index				Oral disposition index
Chromosome	BP	rsid	T2D risk allele	Nearest Gene	EPOCH Risk Allele Frequency	Reported β	Reported SE	β	SE	p-value	FDR	β	SE	p-value	FDR	β	SE	p-value	FDR	β	SE	p-value	FDR	β	SE	p-value	FDR
1	39855177	rs1127215	C	PTGFRN	0.54 (0.36)	0.041	0.004	-0.000470983	0.00950639	0.960515	0.993509	-0.0394855	0.0605955	0.515125	0.923036	-0.0302253	0.0197222	0.126367	0.83861	0.00599132	0.0385939	0.876723	0.956874	-0.0243961	0.059996	0.684561	0.939444
1	51209148	rs35895680	C	-	0.71 (0.31)	0.05	0.005	-0.0020327	0.0111963	0.856041	0.964819	-0.0132107	0.0706275	0.851745	0.964126	0.0131846	0.0231783	0.569867	0.985321	-0.0155446	0.0455134	0.732906	0.956874	-0.0344514	0.0698762	0.622336	0.916592
1	62579891	rs56348580	G	HNF1A	0.70 (0.33)	0.051	0.005	-0.00888979	0.0103382	0.390441	0.964819	-0.156325	0.065556	0.0176965	0.635922	-0.0107201	0.0218683	0.624319	0.985321	-0.0432063	0.0419556	0.303822	0.956874	-0.168918	0.0647664	0.00954357	0.427532
1	117532790	rs12883788	T	AKAP6	0.40 (0.34)	0.033	0.004	0.0145796	0.0100788	0.148929	0.958318	0.0196856	0.0644833	0.760355	0.94035	-0.0127981	0.0210441	0.543514	0.985321	0.0138522	0.0410464	0.735964	0.956874	0.0297108	0.063806	0.641798	0.934868
1	120499573	rs1260326	C	GCKR	0.61 (0.35)	0.063	0.004	-0.00181975	0.00977689	0.852454	0.964819	-0.0690504	0.0627951	0.27235	0.858221	0.00253257	0.0203776	0.901169	0.985321	-0.0288693	0.0396664	0.467228	0.956874	-0.0763305	0.062118	0.220076	0.838299
1	151017991	rs36062478	C	PTEN	0.11 (0.21)	0.039	0.005	-0.00530527	0.0158247	0.737639	0.964819	0.0457473	0.0992509	0.645174	0.923036	-0.0192719	0.0323728	0.552053	0.985321	0.0586571	0.064189	0.361452	0.956874	0.0927823	0.0981206	0.345089	0.879958
1	154324384	rs7147483	T	-	0.72 (0.32)	0.035	0.004	0.0143731	0.0107396	0.181672	0.964819	0.0545817	0.0674224	0.418819	0.923036	0.00339746	0.0225088	0.880118	0.985321	-0.0432301	0.0438242	0.324609	0.956874	-0.017301	0.0667905	0.795781	0.964551
1	177889025	rs56392746	G	CTA-85E5.10	0.92 (0.18)	0.058	0.008	0.00541034	0.0188191	0.773909	0.964819	-0.0458763	0.119096	0.700349	0.94035	-0.0670341	0.038784	0.0848758	0.83861	0.0347352	0.0763989	0.649644	0.956874	-0.0350005	0.11788	0.766728	0.946448
1	205044339	rs7659468	T	SLC9B1	0.43 (0.36)	0.029	0.004	-0.0106309	0.00931536	0.254571	0.964819	0.0081615	0.0609401	0.893547	0.964126	0.00988639	0.0195742	0.613854	0.985321	-0.0471309	0.0378098	0.21342	0.956874	-0.00901717	0.0603116	0.881248	0.974721
1	206621028		T		0.00 (0.04)	0.239	0.035	-0.0787296	0.0807334	0.330154	0.964819	-0.285202	0.490515	0.56137	0.923036	0.149888	0.162229	0.356215	0.967932	-0.127803	0.328249	0.697259	0.956874	-0.304973	0.485415	0.530286	0.906289
1	214159256	rs12187734	C	-	0.56 (0.36)	0.029	0.004	0.000324817	0.00957028	0.972944	0.997777	0.0804063	0.0602827	0.183239	0.843036	0.0177725	0.0196216	0.36574	0.967932	0.0172502	0.0389885	0.658447	0.956874	0.0988412	0.0595687	0.0980676	0.63499
1	219748818	rs11602873	A	ARAP1	0.86 (0.24)	0.099	0.006	0.00327988	0.0139182	0.813841	0.964819	-0.0578475	0.0927548	0.533307	0.923036	0.00376426	0.0297333	0.899335	0.985321	0.0153714	0.05651	0.785775	0.956874	-0.0608174	0.0917914	0.508103	0.906289
1	229672955	rs464605	T	AC022431.2	0.75 (0.30)	0.07	0.004	-0.00469217	0.0115285	0.684255	0.964819	0.0654006	0.0730815	0.371533	0.923036	0.00666012	0.0236357	0.778291	0.985321	-0.0162573	0.0468633	0.728872	0.956874	0.0468184	0.0723727	0.51817	0.906289
1	235542023	rs152839	C	PARP8	0.59 (0.36)	0.028	0.004	0.00814153	0.00963108	0.398508	0.964819	0.0768887	0.0616519	0.213284	0.843036	0.00209834	0.0198688	0.915958	0.985321	0.0285398	0.0391142	0.4661	0.956874	0.0946721	0.0609328	0.12127	0.68467
2	653874	rs56337234	C	-	0.51 (0.32)	0.043	0.004	0.00208078	0.0107571	0.846733	0.964819	-0.0611203	0.0684199	0.372381	0.923036	0.0321312	0.0224046	0.152504	0.83861	-0.0106443	0.0436706	0.807576	0.956874	-0.0749737	0.0676682	0.268735	0.846826
2	16238001	rs16881572	A	-	0.04 (0.15)	0.068	0.011	-0.0210284	0.0239385	0.380318	0.964819	-0.0855258	0.158657	0.59023	0.923036	-0.0819221	0.0530491	0.123505	0.83861	0.0498577	0.0973634	0.608925	0.956874	0.00528475	0.157094	0.973185	0.990781
2	25635771	rs4335	G	ACE	0.51 (0.36)	0.03	0.004	-0.0146523	0.00954778	0.125791	0.932512	0.0295118	0.0611193	0.629537	0.923036	0.0016929	0.0197737	0.931827	0.985321	0.0300347	0.03886	0.440115	0.956874	0.0727794	0.0603711	0.228914	0.838299
2	27730940	rs4479849	A	-	0.40 (0.35)	0.026	0.004	0.0175757	0.00966489	0.0698528	0.901433	-0.0845209	0.0635127	0.184239	0.843036	0.0203224	0.0200116	0.310616	0.957364	0.099737	0.0391164	0.0112132	0.956874	0.0271713	0.063018	0.666646	0.939444
2	43611883	rs62618693	C	QSER1	0.97 (0.13)	0.082	0.011	-0.0158802	0.0259431	0.540865	0.964819	0.0818809	0.163863	0.617646	0.923036	-0.0631928	0.0530873	0.234783	0.92212	-0.0176165	0.105395	0.867352	0.956874	0.101987	0.162136	0.529799	0.906289
2	58975143	rs73239895	T	-	0.09 (0.21)	0.087	0.011	-0.00133268	0.0186857	0.943184	0.993464	0.14794	0.116217	0.203982	0.843036	-0.00233385	0.0378341	0.950851	0.985321	0.000820625	0.075943	0.991385	0.995056	0.162501	0.11495	0.158459	0.810236
2	60586707	rs13266634	C	SLC30A8	0.73 (0.31)	0.102	0.004	0.000743078	0.0109239	0.945807	0.993464	-0.0406636	0.0698664	0.560975	0.923036	0.00509773	0.0226081	0.821747	0.985321	-0.0128877	0.0444225	0.771903	0.956874	-0.0514688	0.0691224	0.457074	0.906289
2	65279414	rs60384372	A	MSRA	0.59 (0.35)	0.035	0.004	-0.00450564	0.00981609	0.646519	0.964819	-0.00695037	0.0625032	0.911529	0.964126	-0.0204814	0.0203178	0.314187	0.957364	-0.0272594	0.0398673	0.494592	0.956874	-0.0358589	0.0618268	0.562341	0.913625
2	111887754	rs17810376	G	GLP2R	0.21 (0.29)	0.028	0.005	0.00936524	0.0117182	0.42472	0.964819	-0.0490536	0.0741446	0.508721	0.923036	0.0359449	0.0247628	0.147595	0.83861	-0.00763033	0.0476227	0.872798	0.956874	-0.061806	0.0733484	0.400079	0.881475
2	121337196	rs10048404	C	WDR7	0.68 (0.32)	0.031	0.005	0.00195843	0.0109386	0.858013	0.964819	0.0496891	0.0690746	0.472464	0.923036	-0.00455023	0.022577	0.840401	0.985321	-0.104726	0.0441193	0.0181599	0.956874	-0.0505937	0.0683594	0.45979	0.906289
2	149428856	rs8043085	T	RASGRP1	0.27 (0.31)	0.041	0.004	0.0107758	0.0111003	0.332343	0.964819	0.0161873	0.0704741	0.818483	0.951843	0.0170724	0.0232943	0.464152	0.979026	-0.0218566	0.0451144	0.62836	0.956874	-0.0345992	0.0697261	0.620092	0.916592
2	158449081	rs9379084	G	RREB1	0.88 (0.20)	0.072	0.006	0.00599398	0.0169904	0.724464	0.964819	-0.131551	0.10642	0.217334	0.843036	0.0255281	0.0347483	0.463084	0.979026	0.0603535	0.0689127	0.381751	0.956874	-0.0486604	0.105545	0.645094	0.934868
2	161333872	rs10228796	G	-	0.51 (0.35)	0.067	0.004	-0.00749811	0.00957153	0.433944	0.964819	0.0510471	0.0614953	0.40712	0.923036	0.0289145	0.0197247	0.143649	0.83861	0.00349859	0.0388982	0.928385	0.982783	0.0550656	0.0608488	0.366189	0.879958
2	165508389	rs28758542	A	AC142119.1	0.71 (0.32)	0.026	0.004	0.00375505	0.0104803	0.720342	0.964819	0.100956	0.0671863	0.13395	0.843036	-0.00732604	0.0216681	0.735506	0.985321	0.0353111	0.0426065	0.407807	0.956874	0.126589	0.0663476	0.057316	0.554737
2	219859171	rs11913442	T	RP1-85F18.5	0.65 (0.35)	0.025	0.004	0.00168299	0.00992122	0.865396	0.967728	0.094411	0.0619451	0.128498	0.843036	-0.0135452	0.0205871	0.511043	0.982218	0.0344511	0.040247	0.392599	0.956874	0.120207	0.0611565	0.0502379	0.542632
2	227105921	rs2169033	T	-	0.69 (0.32)	0.033	0.004	0.00360637	0.0106628	0.735404	0.964819	0.0155025	0.0668993	0.816901	0.951843	-0.0114829	0.0220716	0.603242	0.985321	0.0113169	0.043307	0.794004	0.956874	0.0163959	0.066209	0.804578	0.964781
2	228971884	rs11614914	T	FBRSL1	0.29 (0.34)	0.039	0.004	0.00266308	0.00977858	0.785525	0.964819	-0.0592	0.0618071	0.338899	0.923036	0.0237217	0.0202683	0.242712	0.926407	-0.00279919	0.0397214	0.94386	0.983528	-0.0498785	0.0611949	0.415653	0.893984
2	234303281	rs2608953	T	MED23	0.18 (0.26)	0.035	0.005	0.00265519	0.0132515	0.84131	0.964819	-0.0514338	0.0870939	0.555247	0.923036	-0.068273	0.0278093	0.0146153	0.565822	-0.0374066	0.0540988	0.489749	0.956874	-0.112324	0.086009	0.192531	0.838299
3	12329783	rs6567160	C	RNU4-17P	0.22 (0.31)	0.054	0.004	-0.0100613	0.0108677	0.355201	0.964819	-0.117981	0.0698967	0.0924268	0.843036	0.0238756	0.0226659	0.292961	0.957364	-0.0662384	0.0440313	0.133409	0.956874	-0.140426	0.0690347	0.0427857	0.542632
3	23457080	rs1996617	C	-	0.35 (0.33)	0.029	0.004	-0.00719077	0.0114904	0.531855	0.964819	-0.0243849	0.0725733	0.737095	0.94035	-0.0182402	0.0238889	0.445699	0.979026	-0.0403107	0.0466537	0.388168	0.956874	-0.0451544	0.0717927	0.52984	0.906289
3	47693664	rs11616380	G	-	0.70 (0.32)	0.076	0.004	0.023951	0.010546	0.023757	0.866239	-0.0491367	0.0681611	0.471519	0.923036	0.0582056	0.0215136	0.00718271	0.46926	0.0916706	0.042852	0.0331199	0.956874	0.00205724	0.0675149	0.975711	0.990781
3	49995518	rs730831	T	CTBP1	0.89 (0.22)	0.088	0.007	-0.0185855	0.0160787	0.248517	0.964819	0.0159029	0.100552	0.874437	0.964126	-0.036381	0.0342526	0.288969	0.957364	0.0168125	0.0655014	0.797583	0.956874	0.0523251	0.0994756	0.599257	0.914732
3	53125429	rs13365225	G	-	0.21 (0.30)	0.033	0.005	0.00958464	0.0116163	0.409883	0.964819	0.151371	0.0720042	0.0363346	0.655317	0.0422052	0.0237794	0.0768654	0.83861	0.0445491	0.0472684	0.346613	0.956874	0.173179	0.0710916	0.0154117	0.492667
3	54828827	rs2040792	C	NF1	0.50 (0.37)	0.031	0.004	0.0135402	0.00933293	0.147744	0.958318	0.0456285	0.0602634	0.449533	0.923036	0.0230227	0.019338	0.23471	0.92212	0.0575928	0.0379189	0.129721	0.956874	0.0766538	0.0595387	0.198891	0.838299
3	63948566	rs58090211	C	SLC1A2	0.96 (0.15)	0.054	0.009	-0.00663972	0.0249757	0.790516	0.964819	0.0855632	0.15779	0.588028	0.923036	0.0177596	0.0508225	0.726985	0.985321	0.0582773	0.10137	0.565737	0.956874	0.16111	0.15597	0.302428	0.871894
3	64703394	rs2257883	A	RPSAP52	0.22 (0.31)	0.071	0.005	0.00935131	0.0126697	0.460966	0.964819	0.0904642	0.0817093	0.269086	0.857909	0.0188162	0.0258869	0.467838	0.979026	0.0334496	0.0514783	0.516267	0.956874	0.108286	0.0807934	0.181133	0.818117
3	72803590	rs67269808	A	-	0.93 (0.18)	0.073	0.008	0.0268193	0.0183729	0.145277	0.958318	-0.103946	0.117681	0.377762	0.923036	-0.024531	0.0370978	0.508923	0.982218	0.0117355	0.0748831	0.875559	0.956874	-0.110204	0.116447	0.344686	0.879958
3	77671721	rs2780215	A	-	0.91 (0.19)	0.053	0.009	0.0113416	0.0182567	0.534859	0.964819	-0.0159596	0.114976	0.889692	0.964126	-0.0518264	0.0376244	0.169324	0.83861	-0.0207841	0.0742843	0.779806	0.956874	-0.036107	0.113776	0.75119	0.939444
3	121961461	rs10937721	C	WFS1	0.63 (0.34)	0.076	0.004	0.0017052	0.0102321	0.867742	0.967728	-0.0426788	0.066061	0.518723	0.923036	-0.00412006	0.0211217	0.845467	0.985321	0.00644927	0.0415713	0.876804	0.956874	-0.0339714	0.0653957	0.603799	0.914732
3	123065778	rs12001437	C	-	0.38 (0.34)	0.03	0.004	-0.0038714	0.0098576	0.69476	0.964819	-0.0978294	0.0626599	0.119476	0.843036	0.0229713	0.0205177	0.263724	0.955555	-0.00211734	0.0402426	0.95807	0.983528	-0.104003	0.0619767	0.0943332	0.63499
3	124921457	rs6011155	T	ZBTB46	0.62 (0.34)	0.028	0.004	0.0033451	0.0100426	0.739268	0.964819	-0.0362938	0.0637992	0.569851	0.923036	0.0203523	0.0207172	0.326646	0.963995	-0.00892499	0.0408407	0.827145	0.956874	-0.0415046	0.0631306	0.511384	0.906289
3	129293256	rs9319943	T	-	0.79 (0.28)	0.031	0.005	0.00759747	0.0120071	0.527316	0.964819	0.0696512	0.0753204	0.355823	0.923036	-0.0077422	0.0246637	0.753792	0.985321	-0.0196922	0.0488454	0.687086	0.956874	0.024806	0.0746333	0.739833	0.939444
3	150066540	rs1650505	A	-	0.20 (0.27)	0.041	0.005	-9.10628e-05	0.012295	0.994095	0.997777	0.0696702	0.0806634	0.38841	0.923036	-0.0304629	0.0258903	0.240218	0.926407	0.0615493	0.050341	0.2223	0.956874	0.126239	0.0796065	0.113803	0.656182
3	152084243	rs6792892	C	RBM6	0.49 (0.37)	0.031	0.004	0.00363668	0.0093384	0.697196	0.964819	0.0688248	0.0602923	0.254532	0.857909	-0.0106079	0.0194628	0.586108	0.985321	-0.0507294	0.0378699	0.181269	0.956874	0.00975509	0.0597933	0.870509	0.974721
3	168226052	rs62271373	A	-	0.04 (0.14)	0.065	0.01	-0.00645992	0.0245367	0.792495	0.964819	-0.187581	0.155301	0.22802	0.843036	-0.0219148	0.0508289	0.666649	0.985321	-0.0270366	0.0996392	0.786288	0.956874	-0.178533	0.153727	0.246386	0.838299
3	170724883	rs2633311	C	CAMK2G	0.49 (0.34)	0.024	0.004	0.0120803	0.0100936	0.232196	0.964819	-0.0901532	0.0643925	0.162493	0.843036	0.000473645	0.0208485	0.981889	0.998837	0.0069603	0.0411062	0.865641	0.956874	-0.0917527	0.0637173	0.150874	0.786285
3	183738460	rs12856169	G	-	0.79 (0.28)	0.036	0.006	-0.000835246	0.011952	0.944327	0.993464	0.0923486	0.0752162	0.22046	0.843036	0.00267588	0.0245914	0.913418	0.985321	-0.0161215	0.0485504	0.740049	0.956874	0.0655343	0.0745286	0.379908	0.879958
3	185534482	rs34341	T	ANKDD1B	0.54 (0.36)	0.04	0.004	-0.0068025	0.0101435	0.502907	0.964819	0.111273	0.0634385	0.0804098	0.843036	-0.00179257	0.0208467	0.931529	0.985321	-0.0121255	0.0412338	0.768883	0.956874	0.115618	0.0627529	0.066363	0.575781
3	186665645	rs3747207	A	PNPLA3	0.27 (0.32)	0.041	0.004	0.00474275	0.0109565	0.66538	0.964819	0.0514887	0.070394	0.465064	0.923036	-0.0212816	0.0226695	0.348549	0.967932	-0.010779	0.0446334	0.809311	0.956874	0.0105984	0.0697258	0.879284	0.974721
3	187741842	rs12140153	G	INADL	0.93 (0.19)	0.045	0.008	-0.0158997	0.0184057	0.388273	0.964819	0.0664985	0.115704	0.56589	0.923036	-0.00340805	0.0380603	0.928706	0.985321	0.0768059	0.0746895	0.304515	0.956874	0.199056	0.114015	0.0818206	0.633525
4	720681	rs7633673	G	MBNL1	0.63 (0.35)	0.031	0.004	0.00329681	0.00963603	0.732459	0.964819	-0.0361718	0.061487	0.556769	0.923036	-0.00481472	0.0199695	0.809628	0.985321	-0.0269166	0.039107	0.49174	0.956874	-0.0613312	0.0607877	0.313788	0.879958
4	1240299	rs17036160	C	PPARG	0.91 (0.20)	0.101	0.007	-0.00254303	0.016579	0.878181	0.971376	-0.117652	0.103874	0.258237	0.857909	-0.00316319	0.034227	0.926423	0.985321	0.146237	0.0668507	0.0293778	0.956874	0.035978	0.102995	0.727088	0.939444
4	1784403	rs993380	A	SCD5	0.35 (0.33)	0.027	0.004	-0.00324698	0.0102771	0.752236	0.964819	-0.00918745	0.0643774	0.88661	0.964126	-0.0185775	0.0212112	0.381773	0.972107	0.00579203	0.0417666	0.889787	0.956874	-0.00539112	0.0637152	0.932624	0.990781
4	3241845	rs177045	G	-	0.35 (0.34)	0.034	0.004	0.00577836	0.0098134	0.556365	0.964819	-0.0757182	0.0630294	0.230543	0.843036	-0.0029794	0.0201596	0.882601	0.985321	-0.0173027	0.0399505	0.66521	0.956874	-0.113522	0.0621921	0.0689075	0.575781
4	6306763	rs9384	G	GCDH	0.62 (0.35)	0.04	0.004	-0.0148736	0.00956971	0.121044	0.932512	0.0465511	0.0604644	0.441948	0.923036	0.0120455	0.0199611	0.546634	0.985321	-0.0685996	0.0388108	0.0780248	0.956874	0.000906819	0.0598982	0.987931	0.992401
4	18044357	rs11048457	G	RP11-283G6.4	0.33 (0.34)	0.039	0.004	-0.0032094	0.0103874	0.757531	0.964819	0.0733179	0.0654543	0.263519	0.857909	0.00357992	0.0214306	0.867438	0.985321	-0.0183551	0.0422856	0.664506	0.956874	0.0416189	0.0648673	0.521606	0.906289
4	45186139	rs4810145	C	GNAS-AS1	0.50 (0.36)	0.03	0.004	0.010875	0.00950972	0.253597	0.964819	-0.0617527	0.0604299	0.307627	0.906163	0.0234673	0.0196561	0.233398	0.92212	0.0193527	0.038668	0.617055	0.956874	-0.0546631	0.0598271	0.361591	0.879958
4	52798624	rs7674402	A	MOB1B	0.11 (0.24)	0.052	0.006	-0.0074406	0.016477	0.651859	0.964819	-0.13721	0.102557	0.18191	0.843036	0.00895415	0.0333526	0.78851	0.985321	0.0353779	0.0668923	0.597231	0.956874	-0.0812019	0.101688	0.425165	0.905588
4	71835822	rs429358	T	APOE	0.86 (0.24)	0.059	0.006	-0.00646755	0.014007	0.64456	0.964819	-0.057079	0.0896562	0.524826	0.923036	-0.0412136	0.0289309	0.155254	0.83861	-0.00960944	0.057039	0.866311	0.956874	-0.03077	0.0887728	0.729115	0.939444
4	83584496	rs57767539	A	ERN1	0.08 (0.19)	0.062	0.009	-0.0104134	0.0173707	0.549248	0.964819	-0.0255898	0.107735	0.812405	0.951843	0.00327113	0.0355933	0.926832	0.985321	-0.0660537	0.0710183	0.352974	0.956874	-0.0574422	0.106584	0.590315	0.914732
4	85297954	rs34584161	A	RNF6	0.78 (0.29)	0.057	0.004	0.00538008	0.0117744	0.64801	0.964819	-0.0168665	0.0746906	0.821491	0.951843	-0.00662985	0.0244327	0.786295	0.985321	0.0253028	0.0478974	0.597653	0.956874	0.00510151	0.0739263	0.945028	0.990781
4	89713121	rs12932337	T	RPL13	0.14 (0.24)	0.034	0.005	-0.0105452	0.0139784	0.451126	0.964819	0.0276414	0.0883419	0.754573	0.94035	-0.00936643	0.028823	0.74542	0.985321	0.0549448	0.056998	0.335734	0.956874	0.114721	0.0872029	0.189289	0.838299
4	95114572	rs1421085	C	FTO	0.32 (0.33)	0.118	0.004	0.0049551	0.0106183	0.64104	0.964819	-0.0506753	0.0666921	0.447927	0.923036	0.00437771	0.0220789	0.842954	0.985321	-0.0165139	0.0432113	0.702574	0.956874	-0.0646696	0.0659642	0.327663	0.879958
4	103895317	rs4929965	A	TH	0.40 (0.35)	0.068	0.004	-0.0083438	0.0102128	0.414493	0.964819	-0.0322257	0.0653473	0.622258	0.923036	-0.00185497	0.0212311	0.930431	0.985321	0.0161174	0.0415042	0.69801	0.956874	0.00941844	0.0646969	0.884349	0.974721
4	153520475	rs8054556	A	TMEM219	0.44 (0.34)	0.032	0.004	0.00562978	0.00981294	0.566538	0.964819	-0.0112961	0.0631832	0.858225	0.964126	-0.00411371	0.0203936	0.840267	0.985321	0.0686351	0.0397529	0.0851474	0.956874	0.0411178	0.0624918	0.511043	0.906289
4	157652753	rs8192675	T	SLC2A2	0.67 (0.36)	0.045	0.004	0.00510182	0.00972217	0.600086	0.964819	-0.00313714	0.0616688	0.959461	0.975808	0.0103308	0.0200079	0.605974	0.985321	-0.00869114	0.0395356	0.826133	0.956874	-0.0309341	0.0610082	0.612481	0.916592
4	185716100	rs7156625	A	NRXN3	0.18 (0.27)	0.053	0.005	0.0199142	0.0127947	0.12052	0.932512	-0.0190247	0.0815733	0.815743	0.951843	0.0244126	0.0266984	0.361199	0.967932	0.0574657	0.0522548	0.272222	0.956874	0.0265527	0.0807255	0.742433	0.939444
5	14751305	rs10998338	A	TET1	0.48 (0.36)	0.031	0.004	0.00395886	0.00937734	0.673162	0.964819	-0.0584631	0.0589065	0.321738	0.92125	0.000372349	0.019454	0.984741	0.998837	0.00831734	0.038178	0.82767	0.956874	-0.0500848	0.0583225	0.391136	0.88071
5	44644006	rs858519	T	SAT2	0.44 (0.35)	0.024	0.004	0.00637552	0.00991966	0.520835	0.964819	-0.0723848	0.0628991	0.250695	0.857909	0.0285121	0.0203483	0.162115	0.83861	0.0866383	0.0400459	0.031193	0.956874	0.00726461	0.0623819	0.907368	0.983587
5	50145266	rs2876354	C	RPL35AP3	0.58 (0.36)	0.047	0.004	-0.000173592	0.00941941	0.985307	0.997777	0.054507	0.0600283	0.36457	0.923036	0.0253938	0.0196236	0.196578	0.843783	0.0377439	0.0381881	0.323668	0.956874	0.0939763	0.0592491	0.113728	0.656182
5	51763665	rs1426371	G	WSCD2	0.78 (0.29)	0.043	0.005	-0.00665621	0.0116609	0.568497	0.964819	-0.140232	0.0727103	0.054685	0.702842	0.0340529	0.0240961	0.158559	0.83861	-0.0429185	0.047334	0.365192	0.956874	-0.161769	0.0718064	0.0249652	0.520428
5	53272664	rs12910361	G	HMG20A	0.67 (0.34)	0.069	0.004	0.0172317	0.0100379	0.0869397	0.911026	-0.106957	0.0634488	0.0928519	0.843036	0.0233503	0.020888	0.264453	0.955555	0.0156381	0.0409312	0.702654	0.956874	-0.12231	0.0626987	0.0519833	0.542632
5	55807370	rs2409742	C	-	0.53 (0.35)	0.034	0.004	-0.00259016	0.0102146	0.799976	0.964819	-0.0236176	0.0658342	0.72003	0.94035	-0.0189053	0.0212856	0.375112	0.968146	-0.0562486	0.0414068	0.175215	0.956874	-0.0704131	0.0650467	0.279869	0.851113
5	67714246	rs10758950	A	-	0.26 (0.32)	0.026	0.005	0.00414964	0.0112843	0.713296	0.964819	-0.030299	0.0712594	0.67099	0.923036	0.00650032	0.0233275	0.780688	0.985321	-0.0277917	0.0460499	0.546566	0.956874	-0.0598304	0.0704638	0.396482	0.88071
5	74934009	rs6066138	G	EYA2	0.77 (0.29)	0.042	0.005	0.00990471	0.0116532	0.395937	0.964819	0.0679784	0.0751261	0.366241	0.923036	0.041619	0.0241001	0.0851412	0.83861	-0.102227	0.0471319	0.0307705	0.956874	-0.0369328	0.0744201	0.620051	0.916592
5	76435004	rs6813195	C	-	0.68 (0.32)	0.046	0.004	-0.00133074	0.0106113	0.900274	0.983767	0.0196979	0.0676057	0.770967	0.94035	-0.0221959	0.0220288	0.314411	0.957364	-0.023899	0.043193	0.580413	0.956874	0.0101144	0.0669156	0.879954	0.974721
5	78546293	rs8061528	T	SLX4	0.19 (0.27)	0.035	0.005	0.0160989	0.0122828	0.190835	0.964819	0.0030817	0.0803367	0.969425	0.980277	-0.0202328	0.0257415	0.432446	0.979026	0.084309	0.0498468	0.0916736	0.956874	0.0444363	0.079469	0.576452	0.914732
5	102586407	rs2216063	A	-	0.85 (0.26)	0.03	0.005	0.000657919	0.0132265	0.960356	0.993509	-0.0403644	0.0824116	0.624628	0.923036	0.0216313	0.0269587	0.422921	0.979026	-0.00818268	0.0537323	0.879051	0.956874	-0.0481233	0.081548	0.555537	0.913625
5	133861663	rs76263492	T	CACNA2D3	0.04 (0.14)	0.068	0.011	-0.00500653	0.0243686	0.837342	0.964819	0.188491	0.155268	0.22568	0.843036	-0.0802697	0.0488464	0.101295	0.83861	0.0517843	0.0988972	0.600882	0.956874	0.210734	0.153567	0.170973	0.818117
5	158029734	rs2290203	A	PRC1	0.25 (0.31)	0.051	0.004	-0.00453208	0.0112156	0.686398	0.964819	-0.007174	0.0719186	0.920606	0.964126	-0.0197135	0.0234128	0.400415	0.979026	-0.0449205	0.0454824	0.32402	0.956874	-0.0332554	0.0711535	0.640558	0.934868
5	176679407		A		0.04 (0.14)	0.1	0.016	-0.00885314	0.0285027	0.756287	0.964819	-0.0668867	0.177876	0.707151	0.94035	0.0778635	0.0580242	0.180569	0.83861	0.0830242	0.115648	0.473302	0.956874	0.0277641	0.176076	0.874809	0.974721
6	7231843	rs7178762	C	USP3	0.44 (0.37)	0.032	0.004	0.0177098	0.00920138	0.0550907	0.901433	-0.048653	0.0587461	0.408198	0.923036	0.0246728	0.019315	0.202383	0.843783	0.0229108	0.0376635	0.543388	0.956874	-0.0407411	0.0581589	0.48413	0.906289
6	20688121	rs2820446	C	-	0.73 (0.31)	0.041	0.004	-0.00566554	0.0111767	0.612543	0.964819	0.012758	0.0709408	0.857395	0.964126	-0.050723	0.0229062	0.0275028	0.621104	0.0587269	0.0452828	0.195537	0.956874	0.0783121	0.0700727	0.264608	0.843631
6	31134888	rs17662402	T	RP11-115J16.2	0.95 (0.15)	0.067	0.01	-0.0148906	0.0219873	0.49871	0.964819	0.291252	0.147499	0.0491982	0.666635	0.0442869	0.044782	0.323433	0.963995	-0.00845414	0.0893288	0.924655	0.982673	0.340073	0.14562	0.020161	0.496694
6	32138545	rs697239	T	ZMIZ1	0.56 (0.35)	0.059	0.004	-0.00974951	0.00963987	0.312547	0.964819	-0.00674361	0.0621799	0.913706	0.964126	-0.0211426	0.0200803	0.293173	0.957364	-0.00987766	0.0391904	0.801159	0.956874	-0.0044887	0.0615397	0.941901	0.990781
6	34236973	rs6021276	T	NFATC2	0.37 (0.34)	0.028	0.004	0.00317529	0.010083	0.753017	0.964819	0.0864585	0.0642518	0.179406	0.843036	0.00189097	0.0210949	0.928628	0.985321	-0.0491335	0.0410732	0.232425	0.956874	0.0339566	0.0637454	0.594627	0.914732
6	39282371	rs62255926	A	RFT1	0.76 (0.30)	0.025	0.005	-0.000176663	0.0113723	0.987615	0.997777	-0.144908	0.0717773	0.0443593	0.655317	-0.00267635	0.0232867	0.908572	0.985321	0.0341916	0.0461561	0.459331	0.956874	-0.116393	0.0711962	0.103098	0.63499
6	40409243	rs4923864	G	C15orf52	0.88 (0.22)	0.057	0.006	-0.0188338	0.015676	0.230402	0.964819	0.198603	0.0975634	0.0426352	0.655317	-0.0514324	0.0317363	0.106078	0.83861	-0.0515354	0.0638823	0.420383	0.956874	0.187102	0.0966182	0.0537116	0.542632
6	43813711	rs13434089	T	ATXN7	0.90 (0.20)	0.061	0.005	0.0150129	0.0162826	0.357161	0.964819	-0.0477436	0.106278	0.653577	0.923036	0.05532	0.035034	0.115309	0.83861	0.0709965	0.0660788	0.283387	0.956874	-0.0265639	0.105206	0.800826	0.964551
6	50788778	rs79090772	T	FAF1	0.90 (0.21)	0.073	0.007	0.0188728	0.0156306	0.228094	0.964819	0.0605577	0.101205	0.550029	0.923036	0.0764298	0.0336526	0.0237983	0.621104	0.020034	0.0635884	0.752909	0.956874	0.0770958	0.100124	0.441882	0.906289
6	51413013	rs1111875	C	-	0.66 (0.32)	0.093	0.004	0.00581349	0.0108571	0.592679	0.964819	-0.170362	0.0692225	0.0143949	0.635922	0.010678	0.0225457	0.636095	0.985321	0.00688265	0.0441108	0.8761	0.956874	-0.177635	0.0684357	0.00988917	0.427532
6	107445266	rs362307	T	HTT	0.06 (0.16)	0.048	0.009	-0.0263829	0.0206967	0.203261	0.964819	0.0295628	0.138887	0.83158	0.958971	-0.0962878	0.0423516	0.0236523	0.621104	-0.15799	0.0838449	0.0603652	0.956874	-0.0592523	0.137425	0.666649	0.939444
6	117996631	rs2237897	C	KCNQ1	0.90 (0.20)	0.22	0.007	0.00970303	0.0177176	0.584287	0.964819	-0.0100411	0.111696	0.928427	0.964126	0.0250424	0.0363321	0.491154	0.979026	-0.0693795	0.0720773	0.336439	0.956874	-0.0841584	0.110443	0.446633	0.906289
6	126792095	rs2252115	A	TSHZ2	0.55 (0.36)	0.024	0.004	-0.0116997	0.00942423	0.215284	0.964819	0.0975379	0.059925	0.104608	0.843036	-0.00892012	0.0195556	0.648595	0.985321	-0.0521157	0.0382853	0.174327	0.956874	0.069507	0.0594289	0.243064	0.838299
6	127412728	rs3130283	C	PPT2-EGFL8	0.85 (0.25)	0.062	0.006	0.0150572	0.0137233	0.27332	0.964819	0.0978367	0.087164	0.26254	0.857909	0.0147619	0.0282749	0.601971	0.985321	0.0589421	0.0557232	0.290904	0.956874	0.136734	0.0860918	0.113248	0.656182
6	131926334	rs13094957	T	UBE2E2	0.79 (0.29)	0.064	0.005	-0.0125133	0.011611	0.281914	0.964819	-0.0597586	0.0746825	0.424224	0.923036	-0.013796	0.0245846	0.575076	0.985321	-0.0440854	0.047166	0.350606	0.956874	-0.0630475	0.0739024	0.39425	0.88071
6	137295352	rs80196932	T	NUS1	0.86 (0.24)	0.048	0.005	-0.00262479	0.0140861	0.852288	0.964819	0.0666062	0.0914605	0.467008	0.923036	-0.0258385	0.0288655	0.371384	0.967932	0.0106745	0.0572174	0.852115	0.956874	0.0987337	0.0904218	0.275712	0.849068
6	139837128	rs917195	C	CRHR2	0.71 (0.34)	0.042	0.005	0.00781845	0.0111049	0.481873	0.964819	-0.0375721	0.0693659	0.588447	0.923036	0.0250066	0.0229341	0.276367	0.957364	0.0800457	0.0449628	0.0759148	0.956874	0.058275	0.0686038	0.396288	0.88071
6	160770918	rs58542926	T	TM6SF2	0.05 (0.15)	0.072	0.007	0.0133515	0.0224868	0.55307	0.964819	0.056657	0.144994	0.696246	0.94035	0.0173481	0.0466228	0.710067	0.985321	0.0583278	0.091284	0.523267	0.956874	0.0898049	0.143444	0.531734	0.906289
6	164133001	rs4976033	G	-	0.43 (0.34)	0.025	0.004	0.0255308	0.00997515	0.0109099	0.492765	0.023591	0.0640446	0.712862	0.94035	0.0189716	0.0208973	0.364637	0.967932	0.0500897	0.0407966	0.220364	0.956874	0.0568366	0.0633164	0.370061	0.879958
7	13886654	rs13040225	A	-	0.54 (0.36)	0.033	0.004	0.00168243	0.00931031	0.856705	0.964819	0.00722838	0.0601766	0.904466	0.964126	0.0289056	0.0192809	0.134805	0.83861	0.017234	0.037788	0.648626	0.956874	0.0398065	0.059515	0.504089	0.906289
7	15064190	rs2272163	C	ROBO2	0.58 (0.35)	0.024	0.004	0.00304427	0.00965068	0.752614	0.964819	-0.0804434	0.0611874	0.189577	0.843036	0.0159093	0.0196735	0.419304	0.979026	-0.0504919	0.0390927	0.197365	0.956874	-0.123118	0.0603221	0.0420931	0.542632
7	23884697	rs6975279	A	AUTS2	0.30 (0.32)	0.043	0.004	-0.0139104	0.0105184	0.186882	0.964819	0.0314288	0.0674886	0.641763	0.923036	-0.00771412	0.022194	0.728385	0.985321	0.0191522	0.0428588	0.655252	0.956874	0.0694918	0.0667	0.298288	0.871894
7	28194397	rs1408579	C	ERLIN1	0.61 (0.34)	0.028	0.004	0.00545641	0.0100342	0.586942	0.964819	0.0413483	0.0631764	0.513281	0.923036	-0.0153092	0.0210175	0.466897	0.979026	0.0233197	0.040776	0.567765	0.956874	0.056339	0.0624867	0.367959	0.879958
7	30728452	rs17866443	A	ZNF800	0.03 (0.10)	0.2	0.014	-0.0644211	0.0345786	0.0633066	0.901433	0.0105797	0.214853	0.960758	0.975808	0.033195	0.0697826	0.634616	0.985321	-0.100119	0.143123	0.484695	0.956874	-0.0142402	0.212638	0.946649	0.990781
7	44223721	rs13059382	G	CASR	0.90 (0.21)	0.036	0.006	-0.00892985	0.0161826	0.581431	0.964819	-0.0282544	0.102868	0.783755	0.943989	0.00972904	0.0332315	0.76989	0.985321	-0.00362319	0.0660739	0.956301	0.983528	-0.0319432	0.101804	0.753905	0.939444
7	69649683	rs9873519	T	SLC12A8	0.48 (0.37)	0.037	0.004	0.00280417	0.0093012	0.763227	0.964819	-0.06093	0.0592633	0.304691	0.906163	0.00749828	0.0194495	0.700103	0.985321	0.0260465	0.0377404	0.490566	0.956874	-0.0393498	0.0587097	0.5032	0.906289
7	102976385	rs6777684	G	-	0.66 (0.34)	0.055	0.004	0.0057379	0.0100402	0.568038	0.964819	0.00878595	0.0643227	0.891442	0.964126	-0.00804842	0.0208972	0.700386	0.985321	0.0442281	0.0407136	0.278098	0.956874	0.0503484	0.0635976	0.429156	0.905588
7	117495667	rs34247110	A	KCNK17	0.51 (0.35)	0.031	0.004	0.0120601	0.00971994	0.215539	0.964819	-0.0106665	0.0620825	0.863697	0.964126	0.00662162	0.0199378	0.740019	0.985321	0.0273324	0.0396185	0.490729	0.956874	0.00208106	0.0614455	0.973004	0.990781
7	127058953	rs860262	C	JAZF1	0.57 (0.35)	0.075	0.004	-0.0181239	0.00977948	0.0646991	0.901433	-0.0492624	0.0625349	0.431438	0.923036	0.000420709	0.0204218	0.983577	0.998837	-0.0146592	0.0399534	0.713913	0.956874	-0.0195857	0.0619421	0.752068	0.939444
7	130427057	rs1801645	C	PIM3	0.26 (0.31)	0.037	0.005	-0.00607998	0.0109716	0.579831	0.964819	0.0878838	0.0691703	0.204841	0.843036	-0.0151615	0.0225619	0.502069	0.979026	-0.0661856	0.0444424	0.137339	0.956874	0.0271979	0.0686175	0.692104	0.939444
7	140522073	rs3744347	A	CBX1	0.74 (0.33)	0.03	0.005	-0.0151683	0.0105667	0.152056	0.958318	0.0299104	0.0665446	0.653399	0.923036	0.00469061	0.0220049	0.831336	0.985321	-0.0967839	0.042725	0.0241173	0.956874	-0.0458598	0.0658288	0.486541	0.906289
7	150537635	rs57286125	C	-	0.17 (0.27)	0.061	0.005	0.0138198	0.0131263	0.293153	0.964819	-0.0251333	0.0845999	0.7666	0.94035	0.0156303	0.0273198	0.567637	0.985321	0.0233798	0.0533804	0.661673	0.956874	-0.0275502	0.0837253	0.742336	0.939444
7	156948648	rs3918298	G	CCND1	0.94 (0.17)	0.104	0.01	0.00939477	0.0217593	0.666187	0.964819	0.155093	0.145014	0.28567	0.889846	0.00214181	0.045889	0.962802	0.992089	-0.0239396	0.0883602	0.786606	0.956874	0.0906722	0.143691	0.528489	0.906289
8	8721473	rs28642213	G	GPSM1	0.74 (0.30)	0.082	0.005	0.0231078	0.0112491	0.0407094	0.901433	-0.0888339	0.0714126	0.214454	0.843036	0.0189941	0.0233757	0.417074	0.979026	0.028533	0.0459238	0.534807	0.956874	-0.0954145	0.0706453	0.177801	0.818117
8	9265105	rs4343858	G	NSD1	0.74 (0.32)	0.03	0.005	-0.00704766	0.0108184	0.51519	0.964819	-0.0880923	0.0683617	0.198488	0.843036	0.0387337	0.0221051	0.0806822	0.83861	-0.0241925	0.0439299	0.582192	0.956874	-0.103702	0.0675821	0.125932	0.696481
8	9974584	rs11108094	A	USP44	0.06 (0.16)	0.057	0.009	0.00505619	0.021269	0.812235	0.964819	0.00319722	0.131293	0.980588	0.984219	-0.00336341	0.0437618	0.938785	0.985321	0.0503738	0.086312	0.559855	0.956874	0.0550868	0.129902	0.671812	0.939444
8	11069960	rs3751239	C	RN7SKP15	0.83 (0.26)	0.069	0.005	-0.0223785	0.0126722	0.0782881	0.911026	0.0395515	0.0793744	0.618632	0.923036	0.00735996	0.0266083	0.782262	0.985321	-0.0172941	0.0516936	0.738168	0.956874	0.0400153	0.0785549	0.610838	0.916592
8	19830921	rs10938398	A	-	0.39 (0.35)	0.045	0.004	0.00193549	0.00971176	0.842151	0.964819	-0.0766056	0.0625525	0.22163	0.843036	-0.0137074	0.0204023	0.502157	0.979026	0.00671748	0.0397078	0.86576	0.956874	-0.0786849	0.0618963	0.204594	0.838299
8	30852826	rs7240767	C	LAMA1	0.43 (0.36)	0.034	0.005	7.6952e-06	0.00959646	0.999361	0.999361	0.000759283	0.0605914	0.99001	0.99001	0.0138587	0.019893	0.486516	0.979026	0.0163609	0.0389507	0.674717	0.956874	0.0193113	0.059957	0.747603	0.939444
8	36858483	rs4382480	A	MFHAS1	0.49 (0.35)	0.031	0.004	-0.0178251	0.0097915	0.0695536	0.901433	0.0538225	0.0637503	0.399167	0.923036	-0.0391291	0.0205673	0.0579991	0.83861	-0.0469199	0.039881	0.240209	0.956874	0.033589	0.0631368	0.595103	0.914732
8	41508577	rs2280141	T	PLEKHA1	0.48 (0.36)	0.046	0.005	0.000795344	0.0094732	0.933139	0.993464	-0.174883	0.0598865	0.00375317	0.617102	-0.00550639	0.0198648	0.78181	0.985321	0.00111274	0.0385097	0.976965	0.987901	-0.170631	0.0592921	0.00428177	0.293068
8	95967372	rs149447188	T	ACVR1C	0.01 (0.05)	0.17	0.027	-0.0210621	0.0736411	0.775042	0.964819	-0.352508	0.446107	0.430021	0.923036	-0.104785	0.147856	0.479025	0.979026	-0.111922	0.298954	0.708353	0.956874	-0.429	0.441282	0.331723	0.879958
8	97724430	rs6059662	G	EIF2S2	0.70 (0.33)	0.037	0.004	-0.011064	0.010291	0.283075	0.964819	-0.0121998	0.0651562	0.851596	0.964126	-0.0109864	0.0218041	0.6147	0.985321	-0.00915667	0.0418734	0.827033	0.956874	0.00308344	0.0644881	0.961895	0.990781
8	118184783	rs60251368	G	BRAF	0.06 (0.17)	0.055	0.008	-0.0197768	0.0198512	0.319826	0.964819	0.0402382	0.128609	0.754587	0.94035	0.0213004	0.0415017	0.608134	0.985321	-0.0927871	0.0805627	0.250228	0.956874	-0.0489418	0.127273	0.70084	0.939444
8	128711742	rs10830963	G	MTNR1B	0.27 (0.32)	0.073	0.004	0.0272172	0.0105314	0.0101654	0.492765	-0.174138	0.0663532	0.00910851	0.617102	0.00143931	0.022124	0.948169	0.985321	0.0129148	0.0432319	0.765324	0.956874	-0.197093	0.0654451	0.00281209	0.293068
8	129568078	rs10811661	T	-	0.84 (0.25)	0.147	0.005	-0.00497492	0.0137812	0.718325	0.964819	-0.141535	0.0871782	0.105492	0.843036	-0.0262343	0.0283759	0.355904	0.967932	-0.0032929	0.0559655	0.953115	0.983528	-0.116052	0.0863943	0.180161	0.818117
8	145525277	rs73221116	A	PCGF3	0.04 (0.13)	0.096	0.011	-0.0118571	0.0251727	0.637916	0.964819	0.0495809	0.155943	0.750741	0.94035	0.0240381	0.0514417	0.640611	0.985321	-0.0653438	0.102169	0.522881	0.956874	0.00760171	0.15436	0.960754	0.990781
9	4290085	rs62262091	T	SMARCC1	0.07 (0.17)	0.054	0.008	-0.0379041	0.0199825	0.0586806	0.901433	0.338565	0.128857	0.00902919	0.617102	-0.0634322	0.0415608	0.127929	0.83861	-0.134527	0.0812911	0.0988607	0.956874	0.247833	0.128168	0.054063	0.542632
9	8290816	rs4809906	G	RP4-723E3.1	0.62 (0.34)	0.035	0.004	0.0118427	0.0102149	0.24711	0.964819	-0.0293956	0.0643948	0.648356	0.923036	0.006586	0.0210724	0.754831	0.985321	0.055104	0.0414467	0.184559	0.956874	-0.000900502	0.0637524	0.988739	0.992401
9	19074538	rs9515905	A	-	0.76 (0.31)	0.047	0.004	0.00234238	0.0108441	0.829112	0.964819	-0.0950478	0.0701789	0.176603	0.843036	0.0368048	0.0227402	0.106536	0.83861	0.0647026	0.0439092	0.141516	0.956874	-0.0315024	0.0696372	0.651311	0.938858
9	20790622	rs75307421	A	DEPDC5	0.05 (0.15)	0.074	0.013	-0.0101314	0.0223873	0.651156	0.964819	-0.113129	0.137716	0.412011	0.923036	-0.0114351	0.0450105	0.799617	0.985321	0.0694449	0.0909165	0.445491	0.956874	-0.0182288	0.136441	0.893804	0.974721
9	22134094	rs13415288	C	SPHKAP	0.37 (0.34)	0.026	0.004	-0.0144723	0.0100416	0.150428	0.958318	0.0770823	0.0640198	0.22949	0.843036	-0.033746	0.0207766	0.105304	0.83861	-0.0583141	0.0407681	0.153514	0.956874	0.0387637	0.0634695	0.541814	0.911998
9	28410683	rs2872246	A	ABCC5	0.45 (0.36)	0.027	0.004	-0.000530606	0.00953357	0.955648	0.993509	0.00960248	0.0604824	0.873957	0.964126	0.0260952	0.0195952	0.183896	0.83861	0.0325337	0.0387632	0.401888	0.956874	0.052963	0.059786	0.376369	0.879958
9	34074476	rs2956092	T	APIP	0.36 (0.35)	0.025	0.004	0.00316251	0.0101283	0.755042	0.964819	0.0837947	0.0635556	0.188324	0.843036	0.0328271	0.0206378	0.112674	0.83861	-0.0293204	0.0411561	0.476688	0.956874	0.0332131	0.063048	0.598714	0.914732
9	81344701	rs9991328	T	FAM13A	0.50 (0.35)	0.023	0.004	-0.0062404	0.00947842	0.510733	0.964819	0.0257703	0.0600686	0.66821	0.923036	-0.0265563	0.0195613	0.175541	0.83861	0.0983997	0.038137	0.0102895	0.956874	0.14222	0.0589177	0.0163616	0.492667
9	81907986	rs12192275	G	-	0.82 (0.27)	0.048	0.005	0.00824673	0.012492	0.50959	0.964819	-0.0466367	0.0795796	0.558275	0.923036	0.0224693	0.0257655	0.383821	0.972107	-0.0364586	0.0508831	0.474159	0.956874	-0.0908522	0.0786343	0.248824	0.838299
9	84308948	rs676387	A	RP11-400F19.6	0.24 (0.31)	0.042	0.004	-0.0150857	0.0110277	0.172207	0.964819	0.141757	0.0695604	0.0424067	0.655317	-0.00783312	0.0232784	0.736715	0.985321	-0.039588	0.0448484	0.378011	0.956874	0.128287	0.0689187	0.0636281	0.575781
9	96915002	rs11708067	A	ADCY5	0.76 (0.30)	0.08	0.005	-0.0210631	0.011375	0.0649236	0.901433	0.0863883	0.0727615	0.236023	0.843036	-0.0045321	0.0236668	0.848258	0.985321	-0.0453964	0.0463924	0.328499	0.956874	0.0879716	0.072002	0.22271	0.838299
9	97795421	rs62492368	A	AOC1	0.33 (0.33)	0.031	0.004	0.00794787	0.010365	0.443727	0.964819	0.0412999	0.0657456	0.530349	0.923036	-0.000529412	0.0216981	0.980549	0.998837	0.018225	0.0421168	0.665486	0.956874	0.0269966	0.0650913	0.678611	0.939444
9	136149500	rs8107527	A	RN7SL836P	0.31 (0.33)	0.054	0.004	0.00432196	0.0103041	0.675156	0.964819	-0.0230941	0.0658113	0.725891	0.94035	0.0113701	0.0214472	0.596377	0.985321	-0.0167683	0.0419685	0.68974	0.956874	-0.0572157	0.0650651	0.379885	0.879958
9	139248082	rs13262861	C	NKX6-3	0.82 (0.26)	0.102	0.005	0.0123399	0.012901	0.339484	0.964819	-0.0298186	0.08153	0.714809	0.94035	0.0339084	0.0265394	0.202289	0.843783	0.0233393	0.0524848	0.656826	0.956874	-0.00710787	0.080706	0.929877	0.990781
10	12307894	rs72926932	C	TCF4	0.08 (0.21)	0.073	0.008	-0.00762546	0.0164961	0.644187	0.964819	0.213728	0.103069	0.0389354	0.655317	-0.00499105	0.0338293	0.882801	0.985321	0.0469126	0.0669561	0.483997	0.956874	0.291392	0.101372	0.00432573	0.293068
10	70382179	rs11257655	T	RN7SL232P	0.25 (0.32)	0.095	0.006	0.00450253	0.0106259	0.672026	0.964819	-0.0139198	0.0679437	0.837805	0.962056	-0.0204656	0.0218832	0.350376	0.967932	-0.00139521	0.0432262	0.97427	0.987901	-0.0431202	0.0672035	0.521582	0.906289
10	71321279	rs61779284	A	MACF1	0.19 (0.28)	0.07	0.005	-0.0169388	0.0119022	0.155594	0.958318	0.110795	0.075959	0.145681	0.843036	-0.0284434	0.0246911	0.250188	0.941681	-0.0739037	0.0483312	0.127156	0.956874	0.0466129	0.0753865	0.536818	0.909236
10	75598099	rs2289739	T	LTK	0.38 (0.34)	0.036	0.006	0.00235486	0.0100157	0.814257	0.964819	-0.0279896	0.0639751	0.662047	0.923036	0.0314484	0.0209839	0.134933	0.83861	0.00587588	0.0406631	0.885189	0.956874	-0.0236991	0.0633209	0.708459	0.939444
10	77244336	rs529565	C	ABO	0.33 (0.33)	0.042	0.004	0.0222561	0.0101356	0.0287681	0.866239	-0.03862	0.0658713	0.558103	0.923036	0.058872	0.0212455	0.00591266	0.46926	0.0647138	0.0413326	0.118342	0.956874	-0.0166012	0.0652217	0.799251	0.964551
10	80947438	rs146886108	C	ANKH	1.00 (0.02)	0.381	0.033	0.129661	0.148204	0.382248	0.964819	-0.0435482	0.899202	0.961405	0.975808	0.0204442	0.297974	0.945342	0.985321	0.628719	0.601395	0.296557	0.956874	0.478487	0.889524	0.591021	0.914732
10	89722731		A		0.76 (0.31)	0.05	0.009	-0.00251606	0.011353	0.824741	0.964819	0.0564463	0.0714954	0.430416	0.923036	-0.00896733	0.0233247	0.700894	0.985321	0.00870877	0.046102	0.850281	0.956874	0.0829157	0.0706732	0.241602	0.838299
10	94462882	rs10408163	C	ZC3H4	0.60 (0.35)	0.032	0.004	-0.00169355	0.0105149	0.872139	0.968646	0.0832206	0.0664201	0.211167	0.843036	0.0565314	0.0217177	0.00966839	0.46926	0.0272039	0.0427675	0.525143	0.956874	0.11914	0.065554	0.0701135	0.575781
10	101912194	rs149027146	T	OR4C9P	0.05 (0.14)	0.074	0.01	-0.0119105	0.0237549	0.616414	0.964819	-0.204444	0.153444	0.183714	0.843036	-0.0308008	0.048682	0.527382	0.985321	-0.0585954	0.0964235	0.543795	0.956874	-0.24879	0.15164	0.101878	0.63499
10	114749734	rs1412234	C	LINGO2	0.27 (0.31)	0.04	0.004	0.00292	0.0106601	0.78431	0.964819	-0.0873839	0.0681574	0.200766	0.843036	-0.0148327	0.0219608	0.499896	0.979026	-0.0201088	0.043314	0.642757	0.956874	-0.120192	0.0672887	0.0750378	0.598096
10	121660400	rs117316450	G	COPB1	0.01 (0.08)	0.133	0.017	0.000421779	0.042929	0.992167	0.997777	0.223013	0.260173	0.39201	0.923036	-0.132485	0.0908867	0.145901	0.83861	0.189416	0.173984	0.277048	0.956874	0.422326	0.256681	0.100911	0.63499
10	122930568	rs79310463	T	KSR2	0.13 (0.24)	0.05	0.005	0.0241164	0.0143033	0.0926848	0.92993	-0.110436	0.0929345	0.235613	0.843036	0.0143534	0.0293701	0.625381	0.985321	0.0904738	0.0581858	0.120886	0.956874	-0.0478148	0.0921454	0.604196	0.914732
10	124193181	rs2591392	G	JMY	0.65 (0.33)	0.031	0.004	0.0119728	0.0104466	0.252549	0.964819	0.0556449	0.0673906	0.409604	0.923036	0.0605803	0.0215049	0.00514589	0.46926	0.0136501	0.042485	0.748183	0.956874	0.0729582	0.0666408	0.274452	0.849068
11	2197286	rs2150999	C	FOCAD	0.53 (0.34)	0.024	0.004	0.00706361	0.00999222	0.480099	0.964819	-0.0208986	0.0639135	0.743901	0.94035	-0.00922019	0.0208443	0.658543	0.985321	-0.0188331	0.040584	0.642904	0.956874	-0.0592079	0.0631765	0.349392	0.879958
11	2858546	rs75253922	C	INSR	0.18 (0.29)	0.04	0.005	0.0050247	0.0116316	0.666021	0.964819	-0.0987946	0.0752344	0.190098	0.843036	0.00147551	0.0241754	0.95137	0.985321	0.0300901	0.0472524	0.524681	0.956874	-0.0914249	0.074485	0.22059	0.838299
11	14518419	rs76675804	T	THADA	0.92 (0.19)	0.121	0.007	-0.017655	0.0181367	0.331016	0.964819	0.138855	0.114536	0.226306	0.843036	-0.0314014	0.0377786	0.40648	0.979026	0.0214122	0.0737418	0.77171	0.956874	0.20747	0.113012	0.0673398	0.575781
11	17418477	rs12419690	G	-	0.49 (0.34)	0.03	0.004	0.00516391	0.00991795	0.602936	0.964819	-0.0538697	0.0624786	0.389236	0.923036	0.0485684	0.0206618	0.0193444	0.621104	-0.0460193	0.0402919	0.254187	0.956874	-0.103541	0.0616294	0.0939488	0.63499
11	32956492	rs8010382	G	SMEK1	0.49 (0.36)	0.027	0.004	0.0124806	0.00945149	0.187546	0.964819	-0.00493365	0.060586	0.935151	0.966731	0.00882738	0.0196077	0.652869	0.985321	0.0175347	0.038467	0.648795	0.956874	-0.00293349	0.059962	0.961013	0.990781
11	34908780	rs244415	G	NFAT5	0.61 (0.35)	0.04	0.004	0.00619013	0.00952175	0.516057	0.964819	-0.0276834	0.0605898	0.648063	0.923036	-0.027404	0.0195973	0.162968	0.83861	0.0107622	0.0386842	0.78102	0.956874	-0.0464754	0.0599275	0.438618	0.906289
11	35433712	rs12603589	C	BPTF	0.23 (0.28)	0.042	0.005	0.00110839	0.0120459	0.92674	0.993464	0.0289749	0.0764244	0.704849	0.94035	-0.0119756	0.024885	0.630675	0.985321	-0.0244576	0.0489136	0.617383	0.956874	-0.00684928	0.0756532	0.92792	0.990781
11	43878459	rs3996350	G	-	0.56 (0.35)	0.035	0.004	0.00436524	0.00968415	0.652445	0.964819	-0.0438574	0.0617373	0.477996	0.923036	0.0155655	0.0199447	0.435711	0.979026	-0.00204276	0.0393459	0.958624	0.983528	-0.0545534	0.0610722	0.372408	0.879958
11	45858584	rs1561927	C	RP11-89M16.1	0.30 (0.33)	0.033	0.005	-0.0056896	0.0104169	0.585288	0.964819	-0.0661792	0.0668482	0.322948	0.92125	-0.0181069	0.0216101	0.402714	0.979026	-0.0296858	0.0423304	0.483596	0.956874	-0.0908431	0.0660629	0.17009	0.818117
11	48489360	rs187653072	C	DNAJC2	0.03 (0.12)	0.097	0.014	0.0474293	0.0290073	0.102944	0.92993	-0.0901326	0.194203	0.642889	0.923036	0.0841768	0.0598901	0.160831	0.83861	0.112255	0.118117	0.342589	0.956874	-0.0738549	0.192222	0.70108	0.939444
11	65326154	rs34845373	A	DTNB	0.76 (0.30)	0.033	0.005	-0.0152314	0.011356	0.180716	0.964819	-0.00872048	0.0716752	0.903242	0.964126	-0.0521755	0.0233803	0.0263291	0.621104	-0.0373882	0.0462023	0.418944	0.956874	-0.0241452	0.070925	0.73376	0.939444
11	68835182	rs75432112	A	CTC-503K11.2	0.04 (0.13)	0.132	0.01	-0.0202642	0.0252006	0.421885	0.964819	-0.127118	0.153383	0.407875	0.923036	0.00421198	0.0508444	0.93403	0.985321	0.0280553	0.102398	0.784262	0.956874	-0.0633513	0.151927	0.676977	0.939444
11	69463273	rs2796441	G	RP11-154D17.1	0.62 (0.35)	0.061	0.004	-0.00568828	0.00985701	0.564262	0.964819	0.0279572	0.0641194	0.663126	0.923036	0.020864	0.0206117	0.312184	0.957364	-0.0255758	0.0401252	0.524289	0.956874	0.0142699	0.0634728	0.822268	0.967294
11	72460762	rs7787720	T	-	0.40 (0.36)	0.029	0.004	-0.00725397	0.00964037	0.452289	0.964819	-0.0861699	0.0611986	0.160119	0.843036	0.0114621	0.0201238	0.569362	0.985321	0.0529285	0.0391325	0.177089	0.956874	-0.012662	0.0607564	0.835048	0.967294
11	92708710	rs10440833	A	CDKAL1	0.28 (0.32)	0.129	0.004	0.0119519	0.0106454	0.262332	0.964819	-0.144207	0.0667944	0.0316175	0.655317	0.059644	0.0221845	0.0075498	0.46926	-0.0772978	0.0431398	0.074044	0.956874	-0.223811	0.0653791	0.000701598	0.190133
11	128234144	rs145904381	T	BNIPL	0.99 (0.06)	0.161	0.022	-0.0421116	0.0543097	0.438636	0.964819	-0.21149	0.329818	0.521843	0.923036	0.126453	0.1183	0.285909	0.957364	0.180906	0.220504	0.412546	0.956874	0.0231427	0.326632	0.943561	0.990781
12	4384844	rs35011184	A	TCF7L2	0.24 (0.31)	0.251	0.005	-0.00751647	0.0109756	0.493907	0.964819	-0.0502488	0.0704766	0.476389	0.923036	-0.0184722	0.0225303	0.412888	0.979026	-0.0447504	0.0445489	0.315832	0.956874	-0.0789174	0.0696637	0.258156	0.838299
12	12871099	rs12986742	C	LINC01122	0.49 (0.36)	0.035	0.004	0.0133603	0.00930769	0.152079	0.958318	-0.00564139	0.0593199	0.924296	0.964126	0.00012583	0.019421	0.994835	0.998837	0.0486963	0.0378944	0.199639	0.956874	0.0122902	0.0587052	0.834308	0.967294
12	26463174	rs9859406	A	IGF2BP2	0.34 (0.34)	0.112	0.004	0.0125013	0.0105553	0.237085	0.964819	-0.00896562	0.0674598	0.894356	0.964126	0.0231377	0.0222073	0.298243	0.957364	0.0504022	0.0428781	0.240617	0.956874	0.0188859	0.0667579	0.77744	0.953332
12	27963676	rs7732130	G	ZBED3-AS1	0.28 (0.32)	0.055	0.005	0.00589274	0.0105733	0.577669	0.964819	-0.0721162	0.0685875	0.293869	0.894816	0.00995265	0.0221188	0.65304	0.985321	0.0186607	0.0430399	0.664875	0.956874	-0.0443336	0.0679547	0.514626	0.906289
12	31441179	rs35251247	A	HSD17B12	0.38 (0.35)	0.031	0.004	-0.00110831	0.00999758	0.911793	0.988384	-0.0512774	0.0637318	0.421676	0.923036	0.00562633	0.0206967	0.785914	0.985321	0.00477358	0.0405969	0.906465	0.970957	-0.0435953	0.0630921	0.490094	0.906289
12	66216162	rs7163757	C	-	0.55 (0.36)	0.043	0.004	0.00299151	0.00954553	0.754171	0.964819	-0.0469033	0.0607321	0.440524	0.923036	-0.0200694	0.0196414	0.307647	0.957364	0.00580652	0.0387573	0.880996	0.956874	-0.0432771	0.0601137	0.472115	0.906289
12	71520761	rs55857387	T	ITFG3	0.74 (0.31)	0.044	0.005	0.00111526	0.0112367	0.920996	0.993464	0.0407608	0.0708152	0.565306	0.923036	-0.00152886	0.0229923	0.947025	0.985321	0.0113484	0.0456989	0.804028	0.956874	0.0548291	0.0700537	0.434415	0.905588
12	95928113	rs10096633	C	-	0.84 (0.26)	0.033	0.005	0.00825314	0.013078	0.528413	0.964819	0.0572393	0.083092	0.491421	0.923036	0.000163656	0.0269077	0.995151	0.998837	0.00348706	0.0531917	0.947769	0.983528	0.0675972	0.082209	0.411559	0.893984
12	97849120	rs4237150	C	GLIS3	0.46 (0.34)	0.043	0.004	0.0099636	0.00971946	0.306025	0.964819	-0.0878322	0.061779	0.156111	0.843036	0.0116605	0.0200149	0.560576	0.985321	-0.0422462	0.0395873	0.286646	0.956874	-0.144124	0.0607938	0.0183636	0.496694
12	108629780	rs11651755	C	HNF1B	0.52 (0.36)	0.066	0.004	-0.00433297	0.00958603	0.651547	0.964819	0.0675106	0.0605823	0.265984	0.857909	0.0344943	0.0198289	0.0828855	0.83861	0.00584596	0.0389746	0.880857	0.956874	0.0811204	0.0599011	0.176643	0.818117
12	118406696	rs3798519	C	TFAP2B	0.20 (0.28)	0.047	0.005	-0.0088781	0.0124962	0.477896	0.964819	0.18078	0.0793943	0.0234658	0.635922	-0.0291938	0.0260033	0.262403	0.955555	-0.0778304	0.051118	0.128787	0.956874	0.0926262	0.079054	0.242221	0.838299
12	121432117	rs4930726	T	CCDC92	0.62 (0.35)	0.035	0.004	-0.0251275	0.00941126	0.00794537	0.492765	0.0264065	0.0613389	0.667128	0.923036	-0.050547	0.0196091	0.0103895	0.46926	-0.0390598	0.0385608	0.311801	0.956874	0.018906	0.0607153	0.755715	0.939444
12	123736084	rs56823429	C	CMIP	0.23 (0.30)	0.042	0.005	0.00468708	0.0113672	0.68035	0.964819	0.0167084	0.0711338	0.814451	0.951843	0.0144645	0.0239201	0.545805	0.985321	-0.00792011	0.0462003	0.863987	0.956874	-0.00134286	0.0704068	0.984795	0.992401
12	124428331	rs8056890	A	ATP2A1	0.37 (0.36)	0.03	0.004	0.0034166	0.00963934	0.723223	0.964819	0.0140205	0.0609099	0.8181	0.951843	0.00665326	0.0198958	0.738291	0.985321	-0.0168116	0.0392013	0.668299	0.956874	0.00180324	0.0602872	0.976157	0.990781
12	133070294	rs539515	C	SEC16B	0.21 (0.28)	0.036	0.005	0.0126873	0.0118157	0.283676	0.964819	-0.144215	0.0763611	0.0598766	0.705503	-0.0224132	0.0245889	0.362705	0.967932	0.0638327	0.0480102	0.184543	0.956874	-0.126858	0.075665	0.0946294	0.63499
13	26776999	rs117233795	C	RP11-42A4.1	1.00 (0.01)	0.143	0.02	-0.152805	0.308811	0.621044	0.964819	-0.637014	1.87179	0.733843	0.94035	-0.0956801	0.620392	0.877529	0.985321	-1.14791	1.25262	0.360098	0.956874	-1.67051	1.85042	0.367344	0.879958
13	31017268	rs1929883	G	-	0.56 (0.35)	0.028	0.005	0.0123042	0.00955154	0.198544	0.964819	0.0792048	0.061395	0.197979	0.843036	0.024397	0.0199086	0.221301	0.908676	0.0366188	0.0388237	0.346237	0.956874	0.0758013	0.0607728	0.213229	0.838299
13	33557644	rs10188334	C	-	0.82 (0.27)	0.054	0.005	0.0121066	0.0126926	0.340837	0.964819	0.111688	0.0833427	0.181188	0.843036	-0.00567888	0.02692	0.833057	0.985321	-0.0278643	0.0516412	0.589839	0.956874	0.0856922	0.0825787	0.300214	0.871894
13	51094114	rs11155073	T	-	0.44 (0.36)	0.028	0.004	-0.00213736	0.00965811	0.824988	0.964819	-0.0724301	0.0613691	0.238808	0.843036	-0.0351127	0.0199463	0.0792959	0.83861	-0.00392558	0.0392211	0.920333	0.98193	-0.0772869	0.0607145	0.203984	0.838299
13	58691107	rs11199116	C	SEC23IP	0.22 (0.28)	0.031	0.005	0.00232596	0.0119928	0.846332	0.964819	-0.104815	0.0773437	0.176342	0.843036	-0.00154262	0.0254656	0.951734	0.985321	0.0413426	0.0487078	0.396589	0.956874	-0.0864853	0.0766154	0.259842	0.838299
13	80705315	rs72802365	G	CTRB2	0.94 (0.18)	0.107	0.008	-0.0233517	0.0184364	0.206152	0.964819	-0.0514935	0.128666	0.689275	0.94035	0.0276115	0.0402566	0.493277	0.979026	0.0801267	0.074901	0.285474	0.956874	0.0855549	0.12728	0.501969	0.906289
13	91949562	rs2115107	A	AC010336.1	0.41 (0.35)	0.036	0.004	0.0242098	0.00945235	0.0108545	0.492765	0.0523024	0.0613065	0.394244	0.923036	0.0287851	0.0197605	0.146174	0.83861	0.00975477	0.038742	0.801355	0.956874	0.0200689	0.0607349	0.741294	0.939444
13	109946882	rs17772814	G	CASC11	0.93 (0.15)	0.069	0.012	-0.0355664	0.0224283	0.113705	0.932512	0.0152427	0.143046	0.915208	0.964126	0.0699038	0.0471094	0.138824	0.83861	-0.0465937	0.0913618	0.610385	0.956874	0.0495402	0.141546	0.726581	0.939444
14	33303540	rs80234489	C	FAM60A	0.00 (0.03)	0.097	0.011	0.0570019	0.126538	0.652654	0.964819	0.267042	0.766685	0.727845	0.94035	-0.0541515	0.25415	0.831408	0.985321	0.258794	0.513682	0.614723	0.956874	0.439184	0.758522	0.563009	0.913625
14	38804675	rs2723065	A	CEP68	0.61 (0.35)	0.042	0.004	-0.0107373	0.00970128	0.269157	0.964819	-0.0658481	0.062275	0.291161	0.894816	-0.0158759	0.0203385	0.43562	0.979026	-0.000776282	0.0394641	0.984318	0.991636	-0.0662865	0.0616293	0.282955	0.851113
14	79942647	rs28408270	G	RP11-363G15.2	0.51 (0.34)	0.024	0.004	-0.000889118	0.0099284	0.928694	0.993464	-0.0180681	0.0629311	0.77422	0.94035	-0.0036079	0.0206602	0.86148	0.985321	-0.0273182	0.0403701	0.499055	0.956874	-0.0531851	0.0622177	0.393307	0.88071
14	91963722	rs9316500	T	RP11-175B12.2	0.71 (0.32)	0.04	0.004	0.0062743	0.0107347	0.559273	0.964819	-0.136118	0.0679255	0.0459447	0.655317	-0.00132515	0.022275	0.952598	0.985321	-0.00684737	0.0436381	0.875406	0.956874	-0.13146	0.0672461	0.0514891	0.542632
14	103960026	rs4865796	A	ARL15	0.74 (0.32)	0.048	0.004	0.00368244	0.0106001	0.728505	0.964819	0.0789429	0.0667397	0.237773	0.843036	-0.0164784	0.0220907	0.456246	0.979026	0.0441629	0.0429877	0.304984	0.956874	0.133617	0.0657652	0.0430303	0.542632
15	38828140	rs55691245	G	ACSL1	0.86 (0.24)	0.056	0.006	-0.0114968	0.0141658	0.417587	0.964819	0.0854701	0.0887839	0.336458	0.923036	-0.00475344	0.0302241	0.875128	0.985321	-0.072802	0.0574591	0.206004	0.956874	0.0259398	0.0879874	0.768334	0.946448
15	40634717	rs501470	T	SLC22A3	0.50 (0.34)	0.032	0.004	0.00775279	0.00974923	0.427032	0.964819	0.02866	0.0631947	0.650491	0.923036	0.0374104	0.0206894	0.0715103	0.83861	-0.0169095	0.0397004	0.670426	0.956874	-0.0128876	0.0625598	0.836922	0.967294
15	41801512	rs7274134	C	-	0.74 (0.31)	0.025	0.004	0.00774816	0.0111969	0.48941	0.964819	-0.0826904	0.0713125	0.247122	0.857909	0.00807054	0.0234454	0.730901	0.985321	-0.0125572	0.0455132	0.782789	0.956874	-0.120272	0.0704003	0.0885598	0.63499
15	57369850	rs28490139	G	TCF12	0.84 (0.26)	0.038	0.005	0.0250553	0.0131761	0.0580595	0.901433	-0.182715	0.0847096	0.0317748	0.655317	0.0552757	0.0269659	0.04119	0.83861	0.0591042	0.0536988	0.271814	0.956874	-0.168774	0.0839174	0.0451681	0.542632
15	62391608	rs2066827	G	CDKN1B	0.26 (0.25)	0.032	0.005	-0.00714745	0.0150607	0.635389	0.964819	0.00288569	0.0951929	0.975836	0.983091	-0.0227882	0.0316119	0.47151	0.979026	-0.00250884	0.0612529	0.967353	0.985536	0.021697	0.0942039	0.817995	0.967294
15	63871292	rs10750840	A	TPCN2	0.46 (0.35)	0.024	0.004	0.00356071	0.00963014	0.711799	0.964819	-0.00744213	0.0616892	0.904055	0.964126	0.0158244	0.0199876	0.429113	0.979026	-0.0289885	0.0393013	0.461262	0.956874	-0.0479861	0.0609942	0.432037	0.905588
15	68080886	rs1194592	C	ATP8B2	0.57 (0.36)	0.024	0.004	0.00583878	0.00977822	0.550818	0.964819	-0.0140567	0.0623884	0.821887	0.951843	-0.00409863	0.0200591	0.838227	0.985321	0.0218073	0.039705	0.583201	0.956874	-0.0125717	0.0617463	0.838797	0.967294
15	75814388	rs2255703	T	PLXND1	0.63 (0.33)	0.026	0.004	0.0180567	0.0104288	0.0842704	0.911026	0.0281905	0.0661514	0.670293	0.923036	0.0285165	0.0216431	0.188581	0.83861	-0.0418585	0.0424695	0.325015	0.956874	-0.0393476	0.0654507	0.548159	0.913625
15	77782335	rs10808671	A	RP11-347C18.3	0.45 (0.33)	0.036	0.004	0.00744259	0.0102151	0.466746	0.964819	-0.0498954	0.0649318	0.442817	0.923036	0.0358092	0.0210829	0.090381	0.83861	0.0325184	0.041569	0.434592	0.956874	-0.03836	0.0642868	0.551141	0.913625
15	90381278	rs6976111	A	CTTNBP2	0.24 (0.31)	0.026	0.005	-0.00617059	0.0111563	0.58055	0.964819	-0.0304603	0.0708467	0.667533	0.923036	0.00601182	0.0232927	0.796495	0.985321	0.00766922	0.0453123	0.865698	0.956874	-0.0264875	0.0701213	0.705882	0.939444
15	91512067	rs10773000	G	C12orf65	0.63 (0.34)	0.034	0.004	-0.0214222	0.00975223	0.0287104	0.866239	0.0403086	0.0618972	0.515387	0.923036	0.00124971	0.0202163	0.950747	0.985321	-0.0669223	0.0397925	0.0935191	0.956874	0.0118104	0.0612974	0.84734	0.973004
16	300388	rs113414093	A	CRYBA2	0.04 (0.12)	0.072	0.013	-0.0114271	0.028389	0.687551	0.964819	0.117288	0.176715	0.507365	0.923036	-0.0280432	0.0571457	0.62395	0.985321	0.107513	0.115136	0.351065	0.956874	0.213039	0.1746	0.223331	0.838299
16	3656482	rs8071043	C	ZZEF1	0.40 (0.35)	0.047	0.004	-0.00552431	0.0099048	0.577383	0.964819	-0.0285455	0.0629816	0.650696	0.923036	0.000161156	0.0207064	0.993795	0.998837	-0.010535	0.0402447	0.793652	0.956874	-0.033841	0.0623236	0.587527	0.914732
16	20334808	rs9308614	A	-	0.85 (0.25)	0.057	0.006	0.00728716	0.0137882	0.597487	0.964819	0.0255932	0.0882121	0.771908	0.94035	-0.00831476	0.0294361	0.777766	0.985321	0.0552172	0.0559208	0.324132	0.956874	0.0561203	0.0872567	0.520592	0.906289
16	28897452	rs12625671	C	HNF4A	0.17 (0.28)	0.06	0.006	-0.00413702	0.0136739	0.762415	0.964819	0.0449668	0.0902477	0.618653	0.923036	-0.0044141	0.0279716	0.874708	0.985321	-0.0408065	0.0557738	0.464885	0.956874	0.0359839	0.0893299	0.687357	0.939444
16	29958216	rs12185519	T	KDM4B	0.15 (0.26)	0.036	0.005	-0.00978005	0.0132757	0.461814	0.964819	-0.0388064	0.0829946	0.640414	0.923036	0.0034285	0.0273062	0.90016	0.985321	-0.0395102	0.0541514	0.466116	0.956874	-0.0520888	0.082115	0.526325	0.906289
16	53800954	rs10750397	A	-	0.31 (0.32)	0.04	0.004	-0.00698125	0.0104528	0.504655	0.964819	0.0787157	0.0667983	0.239534	0.843036	-0.0150574	0.0215328	0.484883	0.979026	-0.0244006	0.0424479	0.565778	0.956874	0.0755441	0.0661187	0.254103	0.838299
16	54387084	rs4805881	A	PEPD	0.31 (0.34)	0.038	0.004	-0.00384677	0.0101371	0.704568	0.964819	0.0184863	0.0652922	0.777264	0.94035	-0.00914766	0.0210149	0.663641	0.985321	-0.0131521	0.0411907	0.749695	0.956874	0.00348337	0.0646273	0.95705	0.990781
16	69666683	rs6495182	C	PTPN9	0.73 (0.31)	0.041	0.004	0.0114927	0.010811	0.288498	0.964819	-0.0877618	0.06958	0.208143	0.843036	-0.00857717	0.0224107	0.702176	0.985321	0.0480767	0.0443602	0.279222	0.956874	-0.0697531	0.0689254	0.31232	0.879958
16	75246035		T		0.47 (0.36)	0.023	0.004	-0.00142879	0.00991499	0.885503	0.975493	0.0294786	0.0614499	0.631765	0.923036	-0.0063247	0.0204509	0.757322	0.985321	0.0364122	0.040229	0.366033	0.956874	0.0587157	0.0607479	0.334522	0.879958
16	81533789	rs10737818	G	TBCE	0.69 (0.35)	0.035	0.005	-0.00237941	0.00993249	0.810815	0.964819	0.0101177	0.0638054	0.87411	0.964126	0.00371976	0.0206673	0.857279	0.985321	-0.00849075	0.0403301	0.833377	0.956874	-0.00336625	0.0631501	0.957523	0.990781
16	89630630	rs757110	C	ABCC8	0.35 (0.34)	0.06	0.004	0.0107009	0.0102261	0.296094	0.964819	-0.149498	0.0637313	0.0196161	0.635922	0.00463775	0.0212393	0.827289	0.985321	0.0670278	0.0415316	0.107466	0.956874	-0.0780743	0.0634758	0.219633	0.838299
17	3988451	rs6946660	T	UBE3C	0.60 (0.34)	0.047	0.004	0.0179199	0.0104543	0.0874048	0.911026	-0.00527687	0.067997	0.938193	0.966731	-0.00804978	0.0220061	0.714756	0.985321	0.0265329	0.0426944	0.534707	0.956874	-0.0122004	0.0672933	0.856248	0.974721
17	6953558	rs730497	A	GCK	0.18 (0.26)	0.055	0.005	0.00144509	0.0129427	0.911164	0.988384	0.0317197	0.0837749	0.705221	0.94035	0.0352872	0.0265612	0.184946	0.83861	0.0423237	0.0531948	0.426792	0.956874	0.0952603	0.0827545	0.250567	0.838299
17	7531965	rs34298980	T	LRFN2	0.45 (0.35)	0.035	0.006	0.0183393	0.00968672	0.0591622	0.901433	-0.0988907	0.0620022	0.111738	0.843036	0.0212948	0.0200143	0.288135	0.957364	0.0895189	0.0392467	0.0231638	0.956874	-0.0422281	0.0615671	0.493295	0.906289
17	9787845	rs2453051	C	NOTCH2	0.12 (0.22)	0.061	0.006	-0.0149871	0.0153713	0.330242	0.964819	0.01691	0.0974809	0.862395	0.964126	-0.0206601	0.0318526	0.517049	0.985321	-0.0682414	0.0623943	0.274846	0.956874	-0.012879	0.0964781	0.893891	0.974721
17	17715317	rs7071036	T	-	0.94 (0.16)	0.051	0.007	-0.00529907	0.0218325	0.808371	0.964819	0.0770978	0.142073	0.587752	0.923036	-0.0405563	0.0451438	0.369654	0.967932	-0.164439	0.0889148	0.065258	0.956874	-0.100778	0.14056	0.473928	0.906289
17	29628549	rs893617	C	AP3S2	0.21 (0.30)	0.054	0.004	0.0001095	0.0114323	0.992363	0.997777	0.0244435	0.0736226	0.740105	0.94035	-0.0164565	0.0235991	0.486097	0.979026	0.0127098	0.0464076	0.784347	0.956874	0.04953	0.0728226	0.496918	0.906289
17	36099840	rs348330	G	ABCB10	0.45 (0.36)	0.05	0.005	-0.0044558	0.010069	0.658387	0.964819	-0.023699	0.0637097	0.710157	0.94035	-0.0213054	0.0208142	0.306794	0.957364	-0.0682065	0.0407258	0.0948877	0.956874	-0.0928006	0.0628472	0.140793	0.748134
17	40706273	rs4776970	A	MAP2K5	0.54 (0.37)	0.029	0.004	-0.0118391	0.00939544	0.208489	0.964819	0.017796	0.0600721	0.767241	0.94035	-0.0369821	0.0195613	0.0595793	0.83861	-0.024028	0.0382192	0.52997	0.956874	-0.00326695	0.0594611	0.956219	0.990781
17	46178674	rs28819812	C	-	0.64 (0.32)	0.033	0.004	-0.0120077	0.0106108	0.258569	0.964819	0.0389246	0.0668283	0.560681	0.923036	0.00786077	0.0217006	0.717413	0.985321	-0.0356155	0.0431487	0.409708	0.956874	0.0251496	0.0661602	0.704107	0.939444
17	47060322	rs838720	G	DGKD	0.36 (0.36)	0.034	0.004	0.0117056	0.00960423	0.223755	0.964819	-0.140965	0.0597456	0.0189214	0.635922	0.00264728	0.0199141	0.894328	0.985321	0.0454478	0.0390419	0.245199	0.956874	-0.134546	0.0591668	0.0236461	0.520428
17	61565025	rs7752666	C	-	0.75 (0.30)	0.031	0.004	-0.000913237	0.0112788	0.935514	0.993464	-0.163038	0.070514	0.0214232	0.635922	0.00998699	0.0233856	0.669623	0.985321	-0.00021825	0.0458121	0.996202	0.996202	-0.152676	0.06985	0.0295773	0.542632
17	62203059	rs329118	T	JADE2	0.46 (0.35)	0.028	0.004	0.00497365	0.00968938	0.608063	0.964819	0.0996523	0.0606641	0.101458	0.843036	-0.00369732	0.0201091	0.854237	0.985321	0.0589289	0.0392351	0.134029	0.956874	0.152568	0.0596749	0.0110433	0.427532
17	65825248	rs2725370	T	PURG	0.28 (0.31)	0.032	0.005	0.0069886	0.0108588	0.52027	0.964819	-0.0516653	0.0693076	0.456562	0.923036	0.00677666	0.022598	0.764464	0.985321	0.0397079	0.044106	0.368599	0.956874	-0.0123839	0.0686509	0.856964	0.974721
18	7070642	rs10184004	C	COBLL1	0.60 (0.34)	0.064	0.004	-0.0181146	0.0101755	0.075921	0.911026	-0.0286321	0.0656042	0.662823	0.923036	2.36712e-05	0.0210674	0.999104	0.999104	-0.0186977	0.0415291	0.652827	0.956874	-0.0085299	0.0649461	0.895593	0.974721
18	36746623	rs7227272	G	-	0.91 (0.20)	0.041	0.006	0.0160793	0.0170706	0.346885	0.964819	-0.166337	0.105506	0.115913	0.843036	0.0568444	0.0355284	0.110586	0.83861	0.0205261	0.0693962	0.767575	0.956874	-0.154316	0.104469	0.140648	0.748134
18	53050646	rs9814945	T	SHQ1	0.30 (0.34)	0.032	0.005	0.0128505	0.0107743	0.233805	0.964819	-0.0462543	0.0682232	0.498286	0.923036	0.0418372	0.0220503	0.0586758	0.83861	-0.0162512	0.0438467	0.711135	0.956874	-0.0799681	0.0674176	0.236464	0.838299
18	54578482	rs13099581	C	EGFEM1P	0.85 (0.26)	0.037	0.006	0.000526967	0.0132633	0.96833	0.997777	-0.042569	0.0869529	0.624788	0.923036	0.018784	0.0275933	0.496521	0.979026	0.0329627	0.0539824	0.541855	0.956874	-0.020332	0.0860821	0.813438	0.96685
18	56879827	rs11759026	G	-	0.32 (0.34)	0.059	0.006	-0.0213848	0.0102399	0.0374969	0.901433	0.0327532	0.0654353	0.617047	0.923036	-0.0192766	0.0213334	0.366889	0.967932	-0.0486941	0.0417656	0.244467	0.956874	-0.00885598	0.064785	0.891358	0.974721
18	57829135	rs340874	C	PROX1	0.49 (0.34)	0.054	0.004	-0.00136869	0.0100304	0.891541	0.978169	-0.060504	0.0634237	0.340842	0.923036	0.035773	0.020877	0.0875805	0.83861	-0.00195438	0.0407252	0.961753	0.983528	-0.0670902	0.0627466	0.285798	0.851113
18	60845884	rs3130931	C	POU5F1	0.71 (0.30)	0.048	0.004	0.0182897	0.0111518	0.101902	0.92993	0.0735794	0.0709947	0.300818	0.905796	-0.0305389	0.0231877	0.188765	0.83861	0.0248687	0.0454676	0.584764	0.956874	0.0623196	0.0702954	0.376013	0.879958
19	4967739	rs11240351	G	CNTN2	0.48 (0.36)	0.026	0.004	-0.00502969	0.00931568	0.589603	0.964819	-0.0342167	0.0588031	0.561066	0.923036	-0.00785791	0.0194476	0.68644	0.985321	0.0289692	0.0379429	0.445692	0.956874	0.0154405	0.0582222	0.791032	0.964551
19	7240848	rs66815886	G	ADAMTS9-AS2	0.67 (0.34)	0.04	0.004	-0.00580065	0.0102879	0.573234	0.964819	0.0512786	0.0662898	0.439783	0.923036	-0.0293965	0.0214294	0.171087	0.83861	0.0669371	0.0416819	0.109212	0.956874	0.138271	0.0651999	0.0347365	0.542632
19	7968168	rs3887925	T	ST6GAL1	0.53 (0.36)	0.04	0.004	-0.0174278	0.00950907	0.0677008	0.901433	0.0626937	0.0619035	0.31196	0.909046	-0.0164388	0.0198843	0.409008	0.979026	-0.0653897	0.0387553	0.0924625	0.956874	0.0358453	0.0613328	0.559348	0.913625
19	12505873	rs56365443	A	MARK3	0.68 (0.32)	0.024	0.004	0.00803395	0.0107139	0.453847	0.964819	-0.0537121	0.0677533	0.428523	0.923036	0.0386972	0.0223857	0.0848287	0.83861	0.0327261	0.043528	0.452661	0.956874	-0.0162225	0.0671164	0.809167	0.966009
19	13010643	rs113135335	T	BCL2L11	0.89 (0.22)	0.053	0.007	0.00356161	0.0152341	0.815285	0.964819	-0.129329	0.0958626	0.178284	0.843036	0.0225412	0.0313129	0.472129	0.979026	0.03335	0.0618259	0.589948	0.956874	-0.0857003	0.0950277	0.367837	0.879958
19	19379549	rs76895963	T	CCND2	0.99 (0.06)	0.422	0.02	-0.173773	0.0571623	0.00254656	0.492765	-0.348847	0.412092	0.39791	0.923036	-0.0444004	0.144787	0.7593	0.985321	0.0170674	0.235151	0.942182	0.983528	0.135564	0.408242	0.740062	0.939444
19	33896432	rs6479591	A	C9orf3	0.86 (0.26)	0.033	0.005	0.000157827	0.0130829	0.990382	0.997777	0.00472697	0.083213	0.954736	0.975808	-0.00538824	0.0275869	0.845267	0.985321	0.0125206	0.0531713	0.813979	0.956874	0.0324758	0.0823352	0.693531	0.939444
19	45411941	rs2943650	T	-	0.64 (0.34)	0.081	0.004	0.0111406	0.00999437	0.265762	0.964819	-0.0374855	0.0640676	0.55891	0.923036	0.0119527	0.0205033	0.560324	0.985321	0.0677018	0.0405112	0.095594	0.956874	0.0133382	0.0634376	0.833605	0.967294
19	46158417	rs7991679	T	-	0.84 (0.26)	0.027	0.005	-0.0203025	0.013283	0.127317	0.932512	-0.00752177	0.0838142	0.928549	0.964126	-0.00751019	0.0274212	0.784351	0.985321	0.0168091	0.054272	0.756962	0.956874	0.0342689	0.0829287	0.67972	0.939444
19	47597102	rs9587811	C	-	0.57 (0.33)	0.025	0.004	0.0114329	0.0103646	0.270767	0.964819	0.09274	0.0664885	0.164063	0.843036	0.0286042	0.0218831	0.192098	0.839655	0.0428573	0.0422133	0.310698	0.956874	0.130212	0.0655944	0.0480107	0.542632
20	22428284	rs10879261	G	TSPAN8	0.38 (0.34)	0.034	0.004	0.0166231	0.0100405	0.0987117	0.92993	0.0070469	0.0650772	0.913839	0.964126	0.0223139	0.0208789	0.285993	0.957364	-0.0488172	0.0408828	0.233271	0.956874	-0.0592584	0.0643199	0.357604	0.879958
20	32675727	rs6710938	A	RBMS1	0.79 (0.28)	0.034	0.005	-0.000616581	0.0121189	0.959453	0.993509	0.106141	0.0773695	0.171094	0.843036	-0.00337469	0.0252556	0.893785	0.985321	-0.0121637	0.0493799	0.805574	0.956874	0.067778	0.0767072	0.377598	0.879958
20	42994812	rs2297508	C	RAI1	0.40 (0.33)	0.031	0.004	0.00995914	0.0100858	0.324117	0.964819	0.0589473	0.0642336	0.359487	0.923036	-0.00936687	0.0210204	0.65618	0.985321	0.0247231	0.040982	0.546728	0.956874	0.060331	0.0635656	0.3433	0.879958
20	45594711	rs12789028	A	LTBP3	0.13 (0.24)	0.046	0.005	-0.00633874	0.0138663	0.647864	0.964819	-0.187865	0.0860999	0.0298616	0.655317	-0.0257729	0.0287967	0.371457	0.967932	0.0538425	0.0563908	0.340343	0.956874	-0.114913	0.0856146	0.180504	0.818117
20	48830772	rs4709746	C	RP1-230L10.1	0.83 (0.27)	0.057	0.006	0.0121915	0.0129336	0.346532	0.964819	0.0773086	0.0809028	0.34003	0.923036	-0.00215814	0.0263828	0.934856	0.985321	0.0525776	0.0525234	0.317515	0.956874	0.0997889	0.0799865	0.213126	0.838299
20	50155386	rs7246440	G	ZNF799	0.68 (0.34)	0.03	0.004	0.0291448	0.01026	0.00477011	0.492765	-0.126358	0.066157	0.0570573	0.702842	0.0308819	0.0214287	0.150516	0.83861	0.0496872	0.0421771	0.239587	0.956874	-0.107971	0.0655729	0.100654	0.63499
20	51033681	rs61817176	A	SRGAP2	0.54 (0.37)	0.026	0.004	0.00767776	0.00932234	0.410743	0.964819	0.0582065	0.0597203	0.33049	0.923036	-0.0073987	0.0193984	0.703152	0.985321	-0.00526879	0.0379639	0.889702	0.956874	0.0194465	0.0591847	0.7427	0.939444
20	51620857	rs12380322	G	HAUS6	0.45 (0.36)	0.03	0.004	0.00727037	0.00963418	0.450978	0.964819	0.0968132	0.0610399	0.113741	0.843036	0.0323517	0.0198391	0.10393	0.83861	0.0539295	0.0390818	0.16851	0.956874	0.127615	0.0602214	0.0348741	0.542632
20	57396495	rs10993072	T	-	0.32 (0.34)	0.032	0.004	-0.00803143	0.0100058	0.422714	0.964819	-0.0168096	0.0639394	0.792803	0.950662	-0.020269	0.0206586	0.32726	0.963995	0.0061833	0.0406653	0.879234	0.956874	0.0110333	0.0632843	0.861708	0.974721
20	62450664	rs9472139	C	-	0.24 (0.30)	0.038	0.004	0.00426003	0.0114283	0.709555	0.964819	0.114654	0.0754942	0.129849	0.843036	-0.0115754	0.0236375	0.624675	0.985321	-0.0152407	0.0465373	0.743493	0.956874	0.0895142	0.0748207	0.232458	0.838299
22	30451688	rs13268508	T	HSF1	0.33 (0.33)	0.038	0.004	0.0165019	0.0104156	0.114031	0.932512	0.035243	0.0670532	0.599542	0.923036	-0.00660414	0.0216023	0.760019	0.985321	0.0352286	0.0427097	0.410035	0.956874	0.0543631	0.06632	0.41301	0.893984
22	32203334	rs3012060	T	-	0.11 (0.22)	0.034	0.006	-0.0236076	0.0151633	0.120413	0.932512	0.253205	0.0937944	0.00732262	0.617102	-0.024094	0.0307701	0.434183	0.979026	-0.0945475	0.0615649	0.125522	0.956874	0.191884	0.0932765	0.0405055	0.542632
22	40541838	rs243018	G	AC007381.2	0.49 (0.36)	0.051	0.004	0.0134844	0.0096152	0.161693	0.964819	0.0193732	0.0609646	0.750867	0.94035	0.008186	0.0200163	0.682836	0.985321	0.0379492	0.0391026	0.332479	0.956874	0.0331092	0.0603169	0.583453	0.914732
22	41593581	rs2188848	A	-	0.78 (0.31)	0.033	0.005	0.00779426	0.011061	0.481496	0.964819	-0.0317526	0.0711872	0.655876	0.923036	0.0356672	0.0225496	0.114695	0.83861	0.0458705	0.0452284	0.311202	0.956874	-0.000653893	0.070476	0.992603	0.992603
22	44324855	rs6538805	T	RMST	0.58 (0.34)	0.03	0.004	0.00282929	0.010083	0.779185	0.964819	-0.0406382	0.0641777	0.52706	0.923036	-0.0147362	0.0213076	0.489692	0.979026	-0.00292189	0.040942	0.943147	0.983528	-0.0331169	0.0635294	0.60254	0.914732
22	50356850	rs12454712	T	BCL2	0.66 (0.30)	0.042	0.004	0.00777067	0.0111264	0.485399	0.964819	-0.0907355	0.0719692	0.208342	0.843036	0.0309041	0.0234489	0.188461	0.83861	0.0560433	0.045158	0.215433	0.956874	-0.0633561	0.0713188	0.375039	0.879958

## Sheet: Table S3
Table S3. Single variant analyses in EPOCH of the T2D-associated SNPs in youth from ProDiGY consortium. This table shows the results of additive linear regression models of traits related to glucose – insulin homeostasis in the EPOCH cohort as a function of the SNPs associated with T2D in a recent study of youth. Models controlled for age, sex, BMI z-score, in utero exposure to maternal diabetes,…
						T2D		Fasting glucose				2-hour glucose				HOMA-IR				Insulinogenic Index				Oral disposition index
Chromosome	BP	rsid	T2D risk allele	Nearest Gene	EPOCH Risk Allele Frequency	Reported OR (vs adult controls)	Reported p-value	β	SE	p-value	FDR	β	SE	p-value	FDR	β	SE	p-value	FDR	β	SE	p-value	FDR	β	SE	p-value	FDR
3	185537637	rs937589119*	GT	IGF2BP2	0.34 (0.34)	1.34	3.1 x 10-9	0.0125013	0.0105553	0.237085	0.829797	0.0231377	0.0222073	0.298243	0.521924	0.0504022	0.0428781	0.240617	0.831878	0.0188859	0.0667579	0.77744	0.77744	-0.00896562	0.0674598	0.894356	0.894356
9	96445803	rs10992863	G	PHF2	0.78 (0.31)	1.23	3.2 x 10-8	-0.0153651	0.0114279	0.179661	0.829797	-0.0204673	0.0237881	0.390208	0.546291	-0.0227196	0.0465048	0.625476	0.947048	-0.0876643	0.0714631	0.220861	0.515342	-0.100341	0.0721579	0.165348	0.476598
10	12283161	rs200893788	T	CDC123	0.30 (0.33)	1.32	1.1 x 10-12	-0.00710666	0.0103104	0.491115	0.912279	-0.0256819	0.0212051	0.226739	0.521924	-0.01753	0.0419727	0.676463	0.947048	0.0207141	0.0649402	0.749962	0.77744	0.0418935	0.0655842	0.52344	0.708539
10	114758349	rs7903146	T	TCF7L2	0.32 (0.33)	1.58	8.0 x 10-20	-0.00244863	0.0102943	0.81213	0.943656	0.00101112	0.0212403	0.962061	0.962061	-0.00781068	0.0418275	0.851978	0.991265	-0.0395409	0.0653009	0.545276	0.763387	-0.0339479	0.0659918	0.60732	0.708539
11	2839751	rs2237892	C	KCNQ1	0.89 (0.23)	1.59	4.8 x 10-11	0.00375051	0.015801	0.812519	0.943656	0.036753	0.0326203	0.260712	0.521924	-0.0593359	0.0642678	0.356519	0.831878	-0.084403	0.0995744	0.397292	0.69526	-0.0616572	0.100667	0.540663	0.708539
17	6953155	rs113748381	A	SLC16A11	0.09 (0.21)	1.04	4.1 x 10-8	-0.00132153	0.0186848	0.943656	0.943656	-0.00230242	0.0378316	0.951509	0.962061	0.000831981	0.0759394	0.991265	0.991265	0.162393	0.114943	0.158712	0.515342	0.147842	0.11621	0.204256	0.476598
18	57802714	rs72982988	A	MC4R	0.22 (0.30)	1.53	4.4 x 10-14	-0.00728079	0.0113409	0.521302	0.912279	0.029215	0.0236747	0.218096	0.521924	-0.0636007	0.0459419	0.167142	0.831878	-0.133697	0.0726016	0.0664982	0.465487	-0.107168	0.0735058	0.145862	0.476598
*This SNP was merged into rs113851927 in 2018 and not present in our data. These results are for rs9859406 (see Table S1), which was included in our GRS and is in high linkage disequilibrium with this SNP (R2=1).
